1 **Global elongation and high shape flexibility as an evolutionary hypothesis of accommodating**  
2 **mammalian brains into skulls**

3 Running title: Marsupial brain shape evolution

4 Vera Weisbecker<sup>1\*</sup>, Timothy Rowe<sup>2</sup>, Stephen Wroe<sup>3</sup>, Thomas E. Macrini<sup>4</sup>, Kathleen L. S. Garland<sup>5</sup>, Kenny  
5 J. Travouillon<sup>6</sup>, Karen Black<sup>7</sup>, Michael Archer<sup>7</sup>, Suzanne J. Hand<sup>7</sup>, Jeri Berlin<sup>2</sup>, Robin M.D. Beck<sup>8</sup>,  
6 Sandrine Ladevèze<sup>9</sup>, Alana C. Sharp<sup>10</sup>, Karine Mardon<sup>11</sup> Emma Sherratt<sup>12\*</sup>

7 <sup>1</sup>College of Science and Engineering, Flinders University, Bedford Park, SA 5042

8 <sup>2</sup>Department of Geological Sciences, The University of Texas at Austin, Austin, TX 78712-1692, USA

9 <sup>3</sup>School of Environmental and Rural Science, University of New England, Armidale, NSW, 2351,  
10 Australia

11 <sup>4</sup>Department of Biological Sciences, St. Mary's University, One Camino Santa Maria, San Antonio, TX,  
12 78228 USA

13 <sup>5</sup>School of Biological Sciences, Monash University, Clayton, VIC 3168

14 <sup>6</sup>Western Australian Museum, Locked Bag 49, Welshpool DC, WA, 6986 Australia

15 <sup>7</sup>PANGEA Research Center, School of Biological, Earth and Environmental Sciences, University of New  
16 South Wales, UNSW 2052, Australia

17 <sup>8</sup> School of Science, Engineering and Environment, University of Salford, Salford, M5 4WT, UK

18 <sup>9</sup>CR2P UMR 7207, CNRS/MNHN/Sorbonne Université, Muséum national d'Histoire naturelle, 57 rue  
19 Cuvier CP38, F-75005 Paris, France.

20 <sup>10</sup>Institute of Life Course and Medical Sciences, University of Liverpool, Liverpool L7 8TX

21 <sup>11</sup>Center of Advanced Imaging, The University of Queensland, St. Lucia QLD 4072

22 <sup>12</sup>The University of Adelaide, Adelaide, South Australia 5005, Australia

23 \*Corresponding author e-mail addresses: [vera.weisbecker@flinders.edu.au](mailto:vera.weisbecker@flinders.edu.au);  
24 [emma.sherratt@gmail.com](mailto:emma.sherratt@gmail.com)

25

26 **Abstract**

27 Little is known about how the large brains of mammals are accommodated into the dazzling diversity  
28 of their skulls. It has been suggested that brain shape is influenced by relative brain size, that it evolves  
29 or develops according to extrinsic or intrinsic mechanical constraints, and that its shape can provide  
30 insights into its proportions and function. Here, we characterise the shape variation among 84  
31 marsupial cranial endocasts of 57 species including fossils, using 3D geometric morphometrics and  
32 virtual dissections. Statistical shape analysis revealed four main patterns: over half of endocast shape  
33 variation ranges between elongate and straight to globular and inclined; little allometric variation with  
34 respect to centroid size, and none for relative volume; no association between locomotion and  
35 endocast shape; limited association between endocast shape and previously published histological  
36 cortex volumes. Fossil species tend to have smaller cerebral hemispheres. We find divergent endocast  
37 shapes in closely related species and within species, and diverse morphologies superimposed over the  
38 main variation. An evolutionarily and individually malleable brain with a fundamental tendency to  
39 arrange into a spectrum of elongate-to-globular shapes – possibly mostly independent of brain  
40 function - may explain the accommodation of brains within the enormous diversity of mammalian  
41 skull form.

42 **Keywords:** Brain, marsupials, allometry, spatial packing, neocortex, geometric morphometrics

## 43 **Introduction**

44 The origin of mammals is demarcated by two key innovations: the evolution of a large brain (Rowe et  
45 al. 2011), and a fundamental reorganisation of the skull and particularly the endocranial cavity housing  
46 the brain (Maier 1993; Koyabu et al. 2014). Fitting the brain into the evolving skull with its diverse  
47 functions requires tight evolutionary and developmental integration between the two (Hanken and  
48 Thorogood 1993; Richtsmeier and Flaherty 2013). However, the evolution of this relationship – which  
49 can be characterised through studies of the endocranial cavity, or “endocast” (Jerison 1973; Macrini  
50 et al. 2007a) - is little understood on larger evolutionary scales, with most research focused on the  
51 large-brained primates (Bienvenu et al. 2011; Aristide et al. 2016; Zollikofer et al. 2017) or  
52 experimental rodent models (Lieberman et al. 2008; Nieman et al. 2012), and focused on the  
53 understanding of the exceedingly large human brain.

54 The most widely discussed hypotheses of primate brain shape evolution – mostly done on cranial  
55 endocasts representing the bony braincase cavity mostly occupied by the brain - focus on allometry  
56 (change with size) either related to absolute or relative brain sizes. For example, the influential “spatial  
57 packing” hypothesis posits that relatively larger brains can evolve to be flexed at the base and  
58 rounded, because this packs the brain most efficiently into a limited space (Biegert 1957; Lieberman  
59 et al. 2008; Bastir et al. 2011; Zollikofer et al. 2017). “Spatial packing” is thought to explain the co-  
60 evolution of mammalian brain and cranial base shape in primates (Gould 1977; Ross and Ravosa 1993;  
61 Ross and Henneberg 1995; Bastir et al. 2011) and mouse strains (Lieberman et al. 2008). There is also  
62 general support that absolute brain size (rather than relative brain size) correlates with primate  
63 endocast shape, probably differentially in different clades (Aristide et al. 2016; Sansalone et al. 2020).  
64 However, beyond primates, there are multiple hypotheses of how the mammalian brain is shaped,  
65 involving different levels of organisation. For example, the growing mammalian brain appears to adapt  
66 to endocranial shape changes (Jeffery and Spoor 2006; Macrini et al. 2007c; Budday et al. 2015);  
67 physical internal constraints of neuronal connectivity determine the shape at least of the neocortex

68 (Atkinson et al. 2015; Mota and Herculano-Houzel 2015); and pleiotropic genetic effects appear to  
69 shape both cranial vault and brain and may limit the availability of endocast shapes to selection  
70 (Hanken and Thorogood 1993; Koyabu et al. 2014). Lastly, individual brains can grow and shrink  
71 substantially in the lifetime of an individual, expanding the osseous braincase (Dechmann et al. 2017),  
72 but there is also evolutionary (Koyabu et al. 2014) and developmental (Nieman et al. 2012; Richtsmeier  
73 and Flaherty 2013) evidence that the dorsal cranial vault adapts to increases in brain size, not vice  
74 versa.

75 Characterizing the patterns of mammalian brain shape evolution represents a necessary first step in  
76 unravelling the complex intrinsic and extrinsic determinants of mammalian brain shape and  
77 development. Metatherian mammals (marsupials and their closest extinct relatives) are an ideal study  
78 group for this: they are an old (> 110 million years; Eldridge et al. 2019), monophyletic,  
79 phylogenetically well-understood radiation of mammals and occupy all terrestrial ecological niches  
80 except for active flight. Body masses of living marsupials span three orders of magnitude (2.6 g up to  
81 85 kg; Weisbecker et al. 2019), with extinct representatives weighing up to 2.7 tonnes (Wroe et al.  
82 2004), making them particularly well-suited to resolve current debates on whether brain size and brain  
83 shape are correlated. In addition, the development of living marsupials makes them a more suitable  
84 radiation for studies of brain morphology: marsupials are born at highly altricial stages compared to  
85 placentals, after maximally 30 days of pregnancy, and grow during uniform three-phase lactation  
86 period (Hinds 1988), in which the milk composition is tailored to the requirements of the pouch young.  
87 Marsupial brain development occurs nearly entirely *ex utero* during lactation (Smith 1997).  
88 Reproductive traits relating to maternal investment are an important influence on the variability of  
89 brain growth (e.g. Bennett and Harvey 1985; Barton and Capellini 2011). The relative uniformity of  
90 marsupial reproduction provides an additional argument for this clade to be a test case for mammalian  
91 brain evolution (Pirlot 1981; Weisbecker and Goswami 2010, 2011b; Weisbecker et al. 2015),  
92 particularly because marsupial and placental brains are fundamentally similar in structure (Ashwell

93 2010), relative brain size (Weisbecker and Goswami 2010), and neuronal scaling (Dos Santos et al.  
94 2017).

95 Here we use geometric morphometrics to analyse three-dimensional endocast shape in a sample of  
96 57 marsupial species across all major clades, including 12 fossil species. We aim to determine if a  
97 common pattern of shape variation emerges in marsupials, and whether suggestions for allometric  
98 patterning of endocast shape, posited for primates, can be generalised to marsupials and could  
99 generally explain mammalian brain shape evolution. We also assess suggestions that endocast shape  
100 corresponds with locomotor function (Ahrens 2014; Bertrand et al. 2019b) and phylogeny (e.g. Silcox  
101 et al. 2009; Thiery and Ducrocq 2015; Bertrand et al. 2016; Bertrand et al. 2019b). To further  
102 understand if brain shape is indicative of internal brain structure, we use volume dissections of our  
103 endocasts and a limited dataset of neocortical and isocortical grey matter volumes (noting that iso-  
104 and neocortex largely refer to the same structure; Palomero-Gallagher and Zilles 2015) to assess the  
105 degree to which brain partition volumes and brain shape correspond in a large, phylogenetically  
106 diverse mammalian radiation.

107 **Methods**

108 *Specimens*

109 This study is based on cranial endocasts, which have been shown to be a good approximation of brain  
110 shape for mammals and marsupials in particular (Jerison 1973; Macrini et al. 2007a). Virtual  
111 reconstructions of endocasts from conventional and micro-Computed Tomography ( $\mu$ CT) scans from  
112 adult skulls of 57 marsupial species were prepared in Materialise Mimics (v.17-20) through virtually  
113 “flood-filling” the endocranial cavity of specimens, mostly by two operators, with some help from  
114 technical staff. The list of specimens with their museum numbers is available in the main data file used  
115 in this analysis (Supplementary Table 1). The 3D endocasts files that were landmarked are available  
116 on Figshare ( [10.6084/m9.figshare.12284456](https://doi.org/10.6084/m9.figshare.12284456); a selection of endocasts is illustrated in Fig. 1)

117 One specimen per species was sourced for 38 species, and multiple specimens, where possible  
118 including males and females, were sourced for 19 species to assess how representative a single  
119 endocast is of a species. Scans of extant species were conducted at either the University of Texas High-  
120 Resolution X-ray Computed Tomography Facility (Austin, Texas, USA), a SkyScan 1074 at the University  
121 of Queensland (School of Biological Sciences), or a Siemens Inveon Pet-CT scanner at the UQ Centre  
122 of Advanced Imaging at the University of Queensland (Australia). To allow easy manipulation of large  
123 scans, these were cropped to just the brain case and/or subsampled by either using every second slice  
124 only and/or reducing the resolution of each slice in ImageJ (Schneider et al. 2012). All but three  
125 endocasts were derived from museum specimens (for accession numbers, see Supplementary Table  
126 1). The study also used post-mortem CT scans of one captive dunnart (*Sminthopsis macroura*), and  
127 two captive koalas (*Phascolarctos cinereus*), whose deaths were unrelated to this study. The *S.*  
128 *macroura* specimen was obtained in 2008 from Melbourne University under Animal Ethics MAEC (Vic)  
129 License No. 06118. The koalas were scanned under University of Queensland permit SVS/405/12. CT  
130 scans of twelve fossils were also included. Note that the Tasmanian tiger (*Thylacinus cynocephalus*),  
131 which went extinct in 1936, is here assigned “extant” status because of its very recent extinction. Small



143 *Endocast landmarking and protocol comparisons*

144 Endocast shape was characterised in three dimensions with 29 fixed landmarks, ten curve  
145 semilandmarks, and 32 surface sliding semilandmarks (Figure 2; for anatomical description and  
146 numbering of the landmarking protocols, see Supplementary Information 1). The landmarking of  
147 endocasts represents a challenge because the cerebral hemispheres have large areas with few  
148 landmarkable homologous features. This was exacerbated due to varying scan resolutions, and the  
149 high diversity of brain shapes within our sample, so that landmark repeatability was expected to be  
150 an issue (Pereira-Pedro and Bruner 2018). To capture endocast shape effectively, and test the  
151 repeatability of our resulting landmark dataset, one of us (VW) landmarked each endocast twice and  
152 trialled two different protocols for surface landmark placement. This included a fully manual protocol  
153 using only the Checkpoint programme (Wiley 2015). The other protocol used the Checkpoint software  
154 (Wiley 2015) for fixed and curve semilandmarks, and automatic placement of surface semilandmarks  
155 using the *Morpho* R package (v. 2.8).

156 The performance and similarity of the two surface landmarking protocols was tested in several ways.  
157 To assess repeatability of landmarking, the shape variance from each replicate and each protocol was  
158 evaluated against among-species variance using a Procrustes analysis of variance (ANOVA) (Zelditch  
159 et al. 2012). To test the correspondence between the two protocols, principal components analyses  
160 (PCA) was used to construct two multi-dimensional spaces, and the distribution of species in each  
161 space was compared using a Mantel test in the *Vegan* R package v. 2.5-6 (Oksanen et al. 2016). In  
162 addition, scatter plots of the first two principal components for each protocol, as well as graphs of the  
163 shape changes along the axes, were produced for visual comparison.

164 All automated landmarking procedures, analyses and results were conducted in the R statistical  
165 environment (R core team 2018) and can be replicated with our code on github; the ply files that can  
166 be used for automatic landmarking are in [10.6084/m9.figshare.12253409](https://doi.org/10.6084/m9.figshare.12253409).



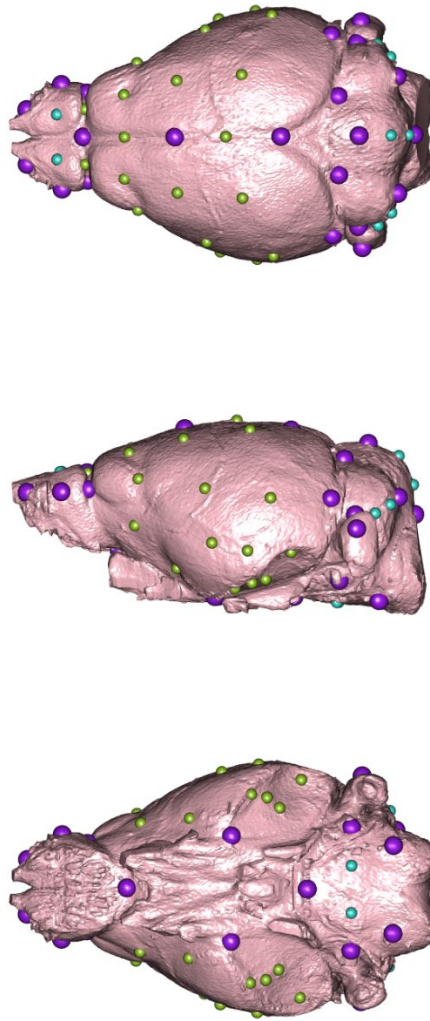

167

168 **Figure 2:** Landmark placement on the brain of *Phascogale tapoatafa* JM12395 (the specimen used to  
169 produce the atlas for automatic landmark placements), warped to the mean shape in geomorph.

170 Large, purple spheres are fixed landmarks; turquoise spheres are curve semilandmarks; and green  
171 spheres are patch semilandmarks.

172

173 *Endocast partitions and additional neo/isocortex data*

174 The endocasts were virtually “dissected” into four partitions representing the cerebrum, olfactory  
175 bulbs, cerebellum, and brain base (the protocol for how the boundaries were defined is in

176 Supplementary information 1). Volumes of the four dissected partitions were measured using Mimics  
177 (versions 17-20) and averaged per species if multiple specimens per species were available. Such  
178 partitions are only approximate representations of brain regions because they do not allow for  
179 internal brain boundaries. However, this method has been successfully used as a general indicator of  
180 overall brain proportions (Sakai et al. 2016; Sakai et al. 2018; Bertrand et al. 2019a) and is used with  
181 this caveat here. A log-shape ratio approach was used to standardise the partition volumes with  
182 respect to scale (Mosimann 1970). This was done by deriving the logarithm of the value obtained by  
183 dividing each partition volume by the geometric mean of all volumes for a specimen, which removes  
184 the isometric component of size and is thus comparable to the scaling of landmark configurations  
185 during generalised Procrustes analysis.

186 Because the neocortex comprises a large part of overall volume of the marsupial brain (Pirlot 1981)  
187 and mammalian cerebral hemispheres (Jerison 2012), we also assessed if any of the endocast shape  
188 or cerebral hemisphere volume variation in our sample was suggestive of neocorticalisation – where  
189 some marsupials, particularly diprotodontians (Pirlot 1981), or extinct mammals in general (Jerison  
190 2012) have relatively larger or smaller neocortices, respectively. While a confident dissection of the  
191 neocortical portion of the cerebral hemispheres was not possible, we matched data from two  
192 publications with a sample that was overlapping ours. We computed the log-shape ratios of neocortex  
193 volumes from Pirlot (1981) for 17 species of marsupials, including members of Didelphimorphia,  
194 Dasyuromorphia, Peramelemorphia and Diprotodontia; and isocortex grey matter volumes for 19  
195 Diprotodontian species from Jyothilakshmi et al. (2020). These log-shape ratios were based on the  
196 larger datasets of histology-based brain region volumes of which the neo/isocortical volume data were  
197 part (for computation of these from the full datasets, refer to the relevant file on github). In one case  
198 for Pirlot (1981) and five cases for Jyothilakshmi et al. (2020), a species in our dataset was matched  
199 with a value from a congeneric species of a similar body weight (noted in Supplementary Table 1).

200

201 *Phylogeny, body mass, and locomotor mode*

202 The details on tree estimation are in Supplementary information 1; the tree files are part of the raw  
203 data folder on this study's github repository. For all phylogenetic analyses, we used three topologies  
204 differing in their placement for the fossil *Yalkaparidon*, whose phylogenetic affinities are uncertain  
205 (Beck et al. 2014). Figure 1 displays one of these phylogenetic topologies. All polytomies were  
206 considered as soft polytomies, and randomly resolved to zero branch lengths using the multi2di  
207 function from the *ape* package v. 5..4-1 (Paradis et al. 2004) in R. In all phylogenetically-informed  
208 analyses in this paper, the use of different topologies had minimal impact on test statistics and no  
209 impact on significance levels, and thus an average of the test statistics from the three trees is  
210 presented here.

211 Body mass estimates for extant species were taken from Weisbecker et al. (2013), and for  
212 fossil species were derived from multiple publications as outlined in Supplementary Table 1 (Wroe et  
213 al. 1999; Argot 2003; Turney et al. 2008; Travouillon et al. 2009; Black et al. 2012; Sharp 2016).

214 All species were allocated broad locomotor categories: arboreal, terrestrial, gliding, scansorial,  
215 hopping and fossorial (Supplementary Table 1). Locomotor data for Australian species were taken  
216 from Weisbecker et al. (2020) , and for American species was taken from Nowak (2018). Note that the  
217 locomotion of the tree kangaroo *Dendrolagus lumholtzi* was scored as "hopping", because this is the  
218 main locomotor mode of the species despite the fact that it lives in trees. Note also that only two  
219 dasyurids (the yellow-footed antechinus and the northern quoll) in the dataset were classified as  
220 "scansorial"; due to this small sample size, these two were classified as "arboreal" because most other  
221 dasyurids are terrestrial, so that a capacity to climb as part of the scansorial locomotor repertoire is  
222 likely to have arisen from terrestrial ancestry. The only fossorial species sampled, *Notoryctes typhlops*,  
223 was excluded from the locomotor analyses.

224

225 *Shape analyses*

226 Landmark coordinates were subjected to a generalized Procrustes superimposition and projection into  
227 tangent space (Rohlf and Slice 1990) using the R package *geomorph* v.3.3.1 (Adams et al. 2020). The  
228 semilandmarks identified as curves were permitted to slide along their tangent directions in order to  
229 minimize Procrustes distance between specimens (Gunz et al. 2005); semilandmarks placed as patches  
230 were allowed to slide in any direction on two planes. The resulting Procrustes shape coordinates were  
231 averaged over the two replicates per specimen. We then performed a second Procrustes fit on the  
232 averaged shape coordinates to account for object symmetry (Klingenberg et al. 2002). Only the  
233 symmetric component of shape was used as shape variables in the subsequent analyses.

234 We performed a PCA of species-averaged shape variables to investigate whether variation  
235 was restricted to one main axis of brain shape variation, or whether variation was diffuse across  
236 several PC axes. For this we examined and plotted all PCs explaining more than 10% of variation. We  
237 estimated how much influence allometry has on the primary axis (PC1) by using phylogenetic  
238 generalized least squares (PGLS) analysis and evaluating a model of PC1 scores against log centroid  
239 size. Note that we used the multivariate generalisation of PGLS (Adams 2014b) implemented in  
240 *procD.pgls* function of *geomorph* for bivariate and multivariate analyses. To visualise the shape  
241 changes associated with each PC axis, we used a surface warping approach (Sherratt et al. 2014)  
242 whereby an average-shaped triangular mesh is warped to the shape at the minima and maxima of  
243 each PC axis using thin-plate spline. The average-shaped mesh was created by taking a species'  
244 endocast the shape of which was most similar to the hypothetical mean shape of all species  
245 (*Phascogale tapoatafa* JM12395) and warping the mesh to this hypothetical mean shape using the  
246 *plotRefToTarget* function in *geomorph*. To aid interpretation of the surface warps, we also produced  
247 landmark displacement graphs depicting the direction and magnitude of shape change vectors of each  
248 landmark from the mean shape to the PC minima and maxima. To visually depict the diversity of  
249 endocast shapes for each major clade as colour-coded in Figure 1, we also warped the mean shape

250 mesh to the mean shape configurations for each of seven clades that had multiple species. We also  
251 display some of the more unusual endocasts discussed in this manuscript (Figure 1).

252

### 253 *Phylogenetic signal, allometry, and locomotor mode*

254 To assess the amount of endocast shape variation that can be explained by phylogenetic relatedness,  
255 we computed  $K_{\text{mult}}$ , an adaptation of Blomberg's K that identifies phylogenetic signal in a multivariate  
256 context (Adams 2014a).  $K_{\text{mult}}$  was computed for endocast shape, centroid size, and brain region  
257 volume (details below) to test the degree to which variation in brain shape, size and volumetric  
258 proportions correspond to Brownian-motion evolutionary processes.

259 To assess the evolutionary allometry in endocast shape, body mass and centroid size were  
260 considered. Centroid sizes were calculated from the endocast landmarks, and we also assessed to see  
261 how well it correlated with endocast volume. We performed a PGLS analysis of the shape variables  
262 against log-transformed endocast size, and statistical assessment was done by permutation, using  
263 1000 iterations for each model. We also calculated a measure of relative brain size, using the residuals  
264 of a linear regression of log-centroid size against log-body mass, which in our sample represents a  
265 good approximation of brain/body mass scaling in marsupials (Weisbecker and Goswami 2011a). To  
266 visualise how endocast shape is predicted by size, we calculated the regression score (Drake and  
267 Klingenberg 2008), which is a univariate summary of the direction of the multivariate regression vector  
268 (calculated during the PGLS), and produced landmark displacement graphs of endocast shape for small  
269 and large brain sizes.

270 To assess if endocast shape was predicted by locomotor mode, we used PGLS to evaluate a  
271 model of shape variables against log-centroid size plus a factor of locomotor categories (details  
272 above). We included analyses to discount the possibility that this relationship might be influenced by  
273 an interaction or difference in intercept between size and locomotor mode.

274 *Intraspecific variation of endocast shape*

275 To assess whether within-species diversity of endocast shapes might have an important impact on the  
276 results of our previous between-species analyses, we compared among-species brain shape variation  
277 to variation within species. To do this, we conducted a PCA of shape variables of all specimens,  
278 calculated the Procrustes distances between all pairs of specimens, and plotted frequency  
279 distributions of the pairwise distances separated into within-species and among species groups.

280

281 *Comparison of endocast shape with partition volume evolution, and relationship with histological*  
282 *neo/isocortical volumes*

283 For an estimate of how well endocast partition volumes correspond with their shapes, the distribution  
284 of species in multi-dimensional PC space between the shape vs. volume PCA was computed using a  
285 Mantel test in the *Vegan* package (Oksanen et al. 2016) in R. We also computed phylogenetic signal  
286 ( $K_{\text{mult}}$ ) and evolutionary allometry of brain partition volumes for comparison with  $K_{\text{mult}}$  of shape  
287 variation. Lastly, we assessed if there was any association between shape, cerebral volume, and the  
288 literature-derived neocortical/isocortical data (explained above), which might be the case if changes  
289 in the relative size of the neocortex are reflected in changes in the relative size of cerebral hemisphere  
290 volume. Such an association would suggest that brain shape or volume can be used as an indicator of  
291 neocorticalisation, where the neocortical part of the cerebrum expands disproportionately (Jerison  
292 2012; Bertrand et al. 2019a). These analyses were done by evaluating PGLS models of the association  
293 between cerebral log-shape ratio and PC2 and neocortex/isocortex grey matter volumes.

294

295 **Results**

296 *Endocast landmarking protocol comparisons*

297 The manual and automated placement protocols for surface semilandmarks performed nearly equally  
298 well on several analyses: in the Procrustes ANOVA comparing replicates, the automated protocol had  
299 slightly higher repeatability (0.91 with manual vs. 0.92 with automated placement). The Mantel test  
300 of PC score matrices revealed a very similar arrangement of species in PC space (matrix correlation =  
301 0.97), and shape variation along PC1 was near-identical as well (Supplementary Fig. 1). Due to the  
302 slightly higher repeatability and better replicability of the automated placement, we present the  
303 results from this protocol; however, all analyses can be re-run using the manual protocol in our github  
304 code, with near-identical results.

305

306 *Endocast shape*

307 The main variation in endocast shape is heavily concentrated on PC1 (Fig. 3), accounting for more than  
308 half (56%) of overall brain shape, with PC2 accounting for an additional 12.5%; the subsequent PCs  
309 explain 7% or less of the overall variation and are not considered here.

310 The shape variation along PC1 is almost entirely related to anteroposterior stretching/compression  
311 that results in cylindrical, slender shapes at low scores, and shorter, wider, and deeper (and hence  
312 more compact and rounded) shapes at high scores (Fig. 3; landmark displacement graphs in  
313 Supplementary Fig. 2). Thus, more “stretched” brain shapes at low PC1 scores have longer, narrower  
314 olfactory bulbs, cerebra, cerebella, and brain bases. High-PC1 brains also tend to have steeper inclines  
315 of the ventral cerebral hemispheres relative to the brain base (Fig. 3, see also supplementary movie 1  
316 ([10.6084/m9.figshare.13331273](https://doi.org/10.6084/m9.figshare.13331273)) and landmark displacement graphs in Supplementary Fig. 2).

317

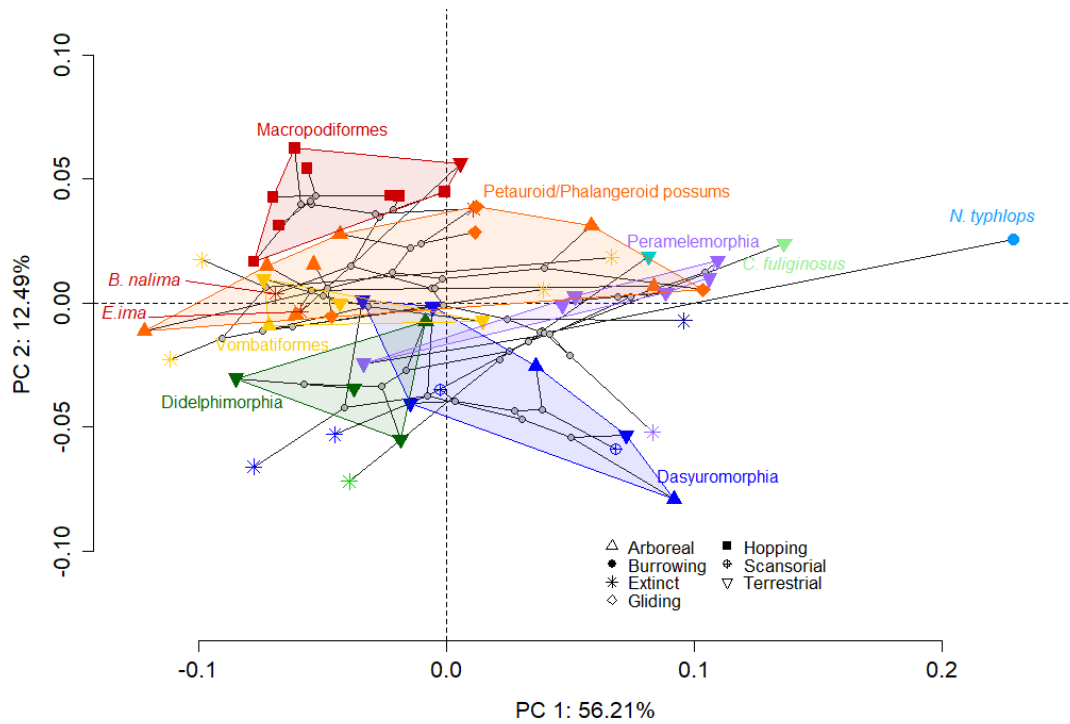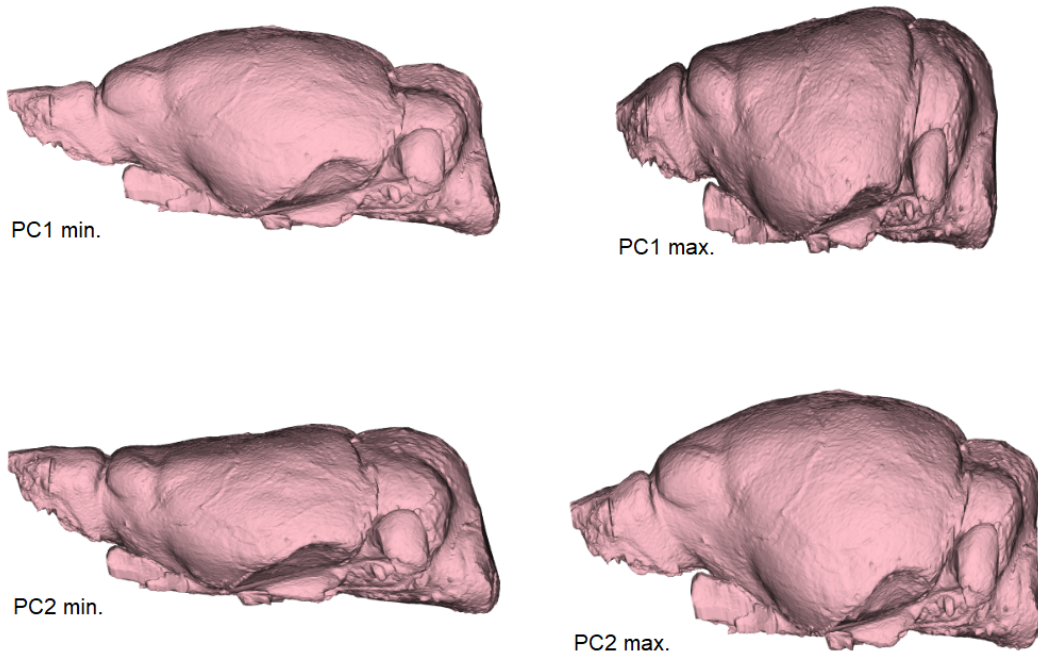

318

319 **Figure 3:** Phylomorphospace (with one of the phylogenies superimposed over the scatter plot) of  
 320 principal component 1 vs PC2 for 57 species of marsupials according to their brain shape (top) and  
 321 corresponding shape variation illustrated as warped endocasts representing the highest and lowest  
 322 PC1 and 2 scores (bottom). Polygons are drawn around living members of all major clades. Stars  
 323 represent fossil species.



324 We also ascertained that the shape variation along PC1 is not driven by two very round-brained  
325 outliers, namely the notoryctimorphian *Notoryctes typhlops* (the highly derived marsupial mole) and  
326 the paucituberculatan *Caenolestes fuliginosus* (a so-called “shrew opossum”; Fig. 1); removal of these  
327 species reduces the magnitude, but not the direction, of shape variation along PC1 and the  
328 arrangement of species relative to each other in PC1/2 morphospace remains near-identical  
329 (Supplementary Fig. 3).

330 At first glance, PC2 (accounting for 12% of shape variation) appears to separate diprotodontians from  
331 other marsupials. Vombatiforms (wombats, koalas, and fossil relatives) and “possums”  
332 (Phalangeroidea and Petauroidea) have overall lower PC2 scores compared to the macropodiform  
333 kangaroos (Fig. 3). However, extending each clade’s morphospace to also include fossil species  
334 (Supplementary Fig. 4) reveals extensive overlap of macropodiforms, vombatiforms, and  
335 petauroid/phalangeroid possums. High scores of PC2 capture a mostly dorsal and slightly posterior  
336 expansion of the cerebral hemispheres relative to the olfactory bulbs and the cerebrum, such that the  
337 cerebrum appears enlarged, as well as a slight forward shift of the brain base (Fig. 2; Supplementary  
338 Fig. 2 and warp movie Supplementary movie 1). Variation in cerebral hemisphere volume is the visually  
339 most conspicuous feature of PC2. Notably, four distantly related fossil species are among the eight  
340 lowest-scoring species on PC2: *Borhyaena tuberata* (an early Miocene member of Sparassodonta,  
341 which is outside the marsupial crown-clade), *Galadi speciosus* (an early Miocene stem-  
342 peramelemorphian), *Barinya wangala* (an early-to-middle Miocene dasyuromorphian), and  
343 *Nimbacinus dicksoni* (a middle Miocene thylacinid).

344

#### 345 *Phylogenetic signal, allometry, and locomotor mode*

346 Overall phylogenetic signal (the degree to which Brownian motion evolution along the phylogeny  
347 explains the distribution of values), as measured by  $K_{\text{mult}}$ , was moderate (0.48) for shape but much

348 higher for size (1.02). As also visible in PC2 of the PC space, each clade tended to have its own brain  
349 shape, but these shapes are broadly similar compared to the diversity of shapes within each clade (see  
350 Fig 1, Supplementary Fig. 5)

351 Size has a significant but minor association with endocast shape, explaining around 7% of shape  
352 variation regardless of whether centroid size (highly-correlated with, and thus equivalent to, brain  
353 volume; Table 1) or body mass is used as a size proxy (Table 1), Relative brain size (residuals of the  
354 regression of log brain volumes against log body mass) was not significantly associated with brain  
355 shape, although this relationship was only just beyond our significance threshold of 0.05 (Table 1).  
356 Plotting the regression score against log-centroid size (Fig. 4) revealed that vombatiforms (wombats,  
357 koalas, and fossil relatives) and peramelemorphians (bandicoots and bilbies) have brain shapes that  
358 do not follow any allometric pattern; removing these two groups from the regression analysis resulted  
359 in a higher contribution of evolutionary allometry to brain shape in the remaining marsupials,  
360 explaining up to 17% of shape variation (Table 1). A PGLS of PC1 and log centroid size showed that  
361 only 12% of PC1 is explained by centroid size (Table 1). However, the variation explained by allometry  
362 appears to be a subset of the much greater variation along PC1: the landmark displacement graphs  
363 describing the shape change from the predicted values for a small compared to a large endocast (Fig.  
364 4) are very similar to the shape changes associated with minimum and maximum PC1 scores.

365

366

367

368

369

370 **Table 1:** Summary table of all PGLS analyses conducted in this study. Df, degrees of freedom; F, F-value  
 371 of effect size; R<sup>2</sup>, R-squared value; *p*, probability of no effect. Sample sizes for factorial categories are  
 372 noted in the predictor column, except for arboreal (n=11+2 scansorial species) and terrestrial (n=19);  
 373 locomotion. Bold *p* – values denote values below our significance threshold of 0.05.

| Dependent variable                                                                              | Predictor                                                             | Df | F       | R <sup>2</sup> | <i>p</i>     |
|-------------------------------------------------------------------------------------------------|-----------------------------------------------------------------------|----|---------|----------------|--------------|
| <b>Allometry</b>                                                                                |                                                                       |    |         |                |              |
| Centroid size                                                                                   | Brain volume                                                          | 55 | 11925.1 | 0.995          | <b>0.000</b> |
| Shape variables                                                                                 | Log-centroid size                                                     | 55 | 4.267   | 0.07           | <b>0.011</b> |
| Shape variables                                                                                 | Log-body mass                                                         | 55 | 3.84    | 0.07           | <b>0.017</b> |
| Shape variables                                                                                 | Residuals of log-brain volume/log-body mass regression                | 55 | 2.408   | 0.04           | 0.051        |
| Shape variables without vombatiforms and peramelemorphs                                         | Log-centroid size without vombatiforms (n=8) and peramelemorphs (n=7) | 40 | 7.91    | 0.17           | <b>0.001</b> |
| Shape variables without vombatiforms and peramelemorphs                                         | Log-body mass without vombatiforms and peramelemorphs                 | 40 | 6.768   | 0.14           | <b>0.001</b> |
| PC1 scores                                                                                      | Log-centroid size                                                     | 55 | 7.186   | 0.12           | <b>0.02</b>  |
| <b>Locomotion</b>                                                                               |                                                                       |    |         |                |              |
| Shape variables                                                                                 | Interaction term, locomotor modes (see caption) and log-centroid size | 35 | 0.894   | 0.06           | 0.582        |
| Shape variables                                                                                 | All locomotor modes (see caption) with log-centroid size as covariate | 38 | 0.748   | 0.05           | 0.752        |
| Shape variables                                                                                 | All locomotor modes                                                   | 40 | 1.056   | 0.07           | 0.367        |
| Shape variables of diprotodontians                                                              | Hopping (n=8)/nonhopping (n=16)                                       | 22 | 0.285   | 0.01           | 0.971        |
| Shape variables of diprotodontians                                                              | Gliding (n=4)/nongliding (n=20)                                       | 22 | 1.433   | 0.06           | 0.209        |
| <b>Associations among partition volumes, neocortex/isocortex grey matter volumes, and shape</b> |                                                                       |    |         |                |              |
| Brain region vol. log-shape ratio (LSR)                                                         | Log-geometric mean                                                    | 55 | 2.383   | 0.04           | 0.086        |
| Brain region vol. LSR                                                                           | Log-body mass                                                         | 55 | 1.794   | 0.03           | 0.161        |
| Shape variables                                                                                 | Cerebral vol. LSR                                                     | 55 | 4.606   | 0.08           | <b>0.003</b> |
| Shape PC2 scores                                                                                | Cerebral vol. LSR                                                     | 55 | 11.779  | 0.18           | <b>0.003</b> |
| Shape PC2 scores                                                                                | Extant (n=45 vs. fossil (n=12)                                        | 55 | 12.476  | 0.18           | <b>0.003</b> |
| Cerebral LSR                                                                                    | Extant vs. fossil                                                     | 55 | 13.07   | 0.19           | <b>0.001</b> |
| Shape PC2 scores                                                                                | Diprotodontians (n=31) vs. others (26)                                | 55 | 0.827   | 0.01           | 0.361        |
| Cerebral LSR                                                                                    | Diprotodontians vs. others                                            | 55 | 1.563   | 0.03           | 0.209        |
| Shape variables                                                                                 | Isoc. grey matter vol. LSR                                            | 17 | 0.578   | 0.03           | 0.672        |
| Cerebral LSR                                                                                    | Isoc. grey matter vol. LSR                                            | 17 | 3.99    | 0.19           | 0.053.       |
| Shape PC2 scores                                                                                | Isoc. grey matter vol. LSR                                            | 17 | 1.101   | 0.06           | 0.317        |
| Shape variables                                                                                 | Neoc. vol. LSR                                                        | 15 | 1.532   | 0.09           | 0.174        |
| Cerebral LSR                                                                                    | Neoc. vol. LSR                                                        | 15 | 5.72    | 0.28           | <b>0.028</b> |
| Shape PC2 scores                                                                                | Neoc. vol. LSR                                                        | 15 | 2.911   | 0.16           | 0.108        |

374

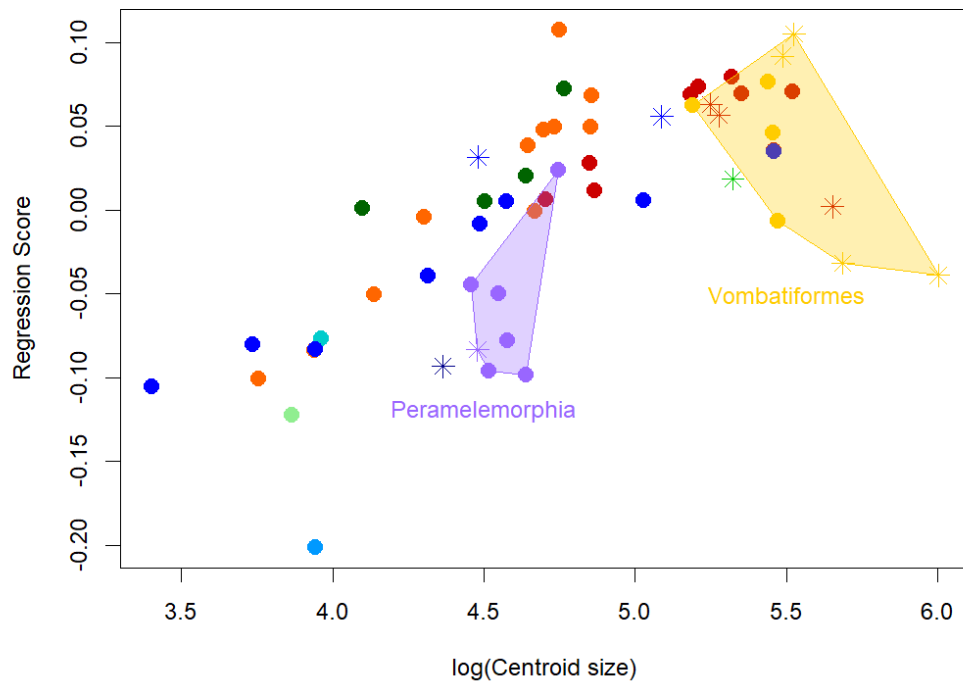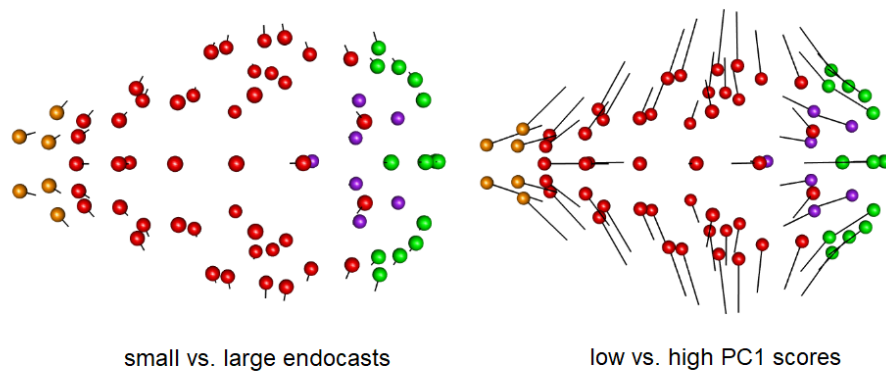

375

376 **Figure 4:** Top: Plot of regression score against log-centroid size showing a small signal of  
377 evolutionary allometry in endocast shape ( $R^2=0.072$ ,  $p=0.001$ ). Colouration as in Fig. 1, stars are  
378 fossil species. Bottom left: Shape changes associated with small to large centroid sizes, shown as  
379 landmark displacement graph where ball represents small endocasts and lines point towards large  
380 configuration. Bottom right: Shape changes associated with PC1 for comparison with the allometric  
381 pattern, where balls indicate the landmark configuration of low PC scores and lines point towards  
382 the configuration of shapes with high PC1 scores. Ball colours differentiate landmarks over the  
383 surface of four brain regions: olfactory bulbs (orange), cerebrum (red), cerebellum (green), and brain  
384 base (purple)

385 We found no statistical association between any locomotor mode and brain shape (Table 1). However,  
386 locomotor mode is phylogenetically confounded among marsupials, particularly in relation to the  
387 single evolutionary transformation towards an upright posture related to hopping. This is relevant  
388 because the hopping kangaroos visually appear to score higher on PC2 than most other marsupials,  
389 except the possibly non-upright fossils *Ekaltadeta ima* and *Balbaroo nalima* (Den Boer et al. 2019),  
390 which are among the lowest-scoring diprotodontians (Fig. 3). However, we cannot distinguish whether  
391 this relates to locomotor mode or represents a random effect of Brownian motion. Note that  
392 differences between Macropodiformes and the remaining marsupials is concentrated in a dorsal and  
393 anterior expansion of the cerebral hemispheres, rather than the region of potential postural  
394 differences around the back of the brain (Russo and Kirk 2013), as shown in a follow-up visualisation  
395 comparing the mean landmark configurations of kangaroos *versus* other Diprotodontia  
396 (Supplementary Fig. 6). The arboreal dasyurid *Phascogale tapoatafa* and arboreal diprotodontians are  
397 widely separated in PC morphospace; similarly, the possum genera *Petaurus*, *Petauroides*, and  
398 *Acrobates*, which have independently evolved gliding adaptations, have widely diverging brain shapes  
399 in PC1/PC2 space. It is also noteworthy that the ecologically very similar wombat genera *Vombatus*  
400 and *Lasiorhinus* are widely separated on PC1.

401

#### 402 *Intraspecific variation of endocast shape*

403 A PCA of all specimens revealed substantial intraspecific variation in species represented by more than  
404 one specimen, with several instances where species overlap in PC morphospace but individuals of the  
405 same species are well separated (Fig. 5). This is consistent with clear visual differences of brain shapes  
406 within some species (see Supplementary Fig. 7, which compares strikingly different endocasts of two  
407 red kangaroo [*Macropus rufus*] individuals). However, comparison between intraspecific and  
408 interspecific Euclidean distances in Procrustes space (Supplementary Fig. 8) shows that, in terms of  
409 overall shape, intraspecific shape variation is much lower than interspecific variation.

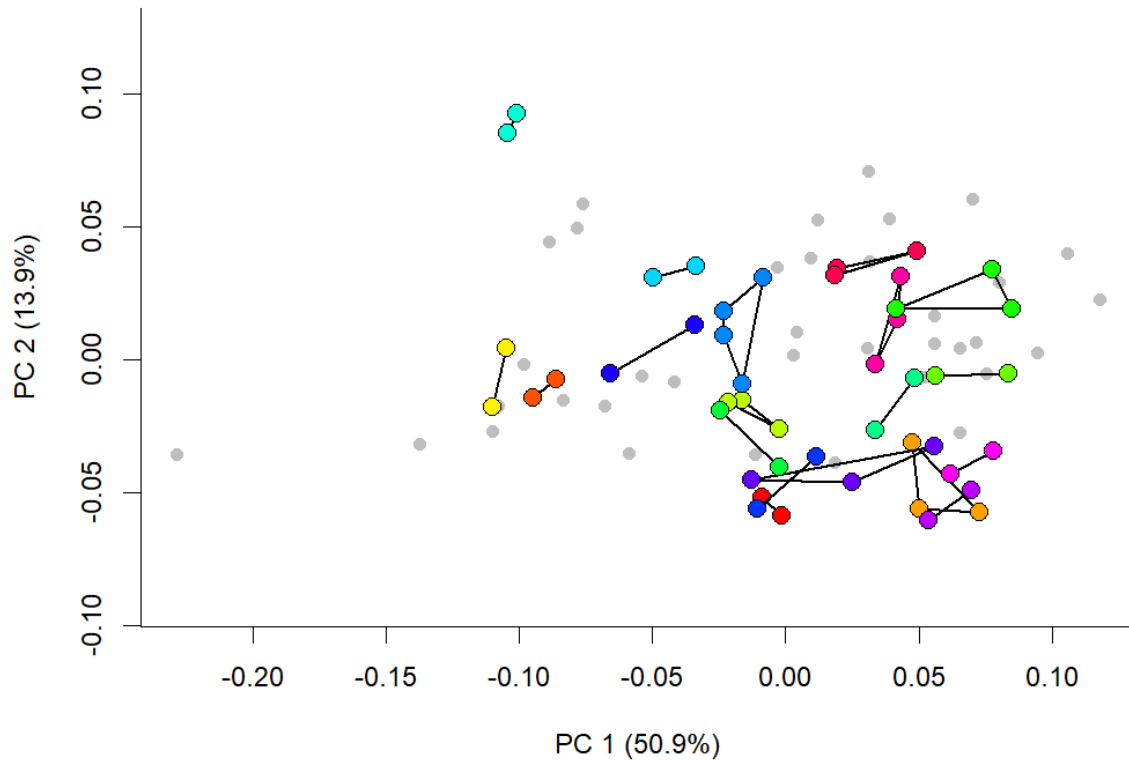

410

411 **Figure 5:** Plot of principal component 1 vs PC2 for all specimens according to their brain shape.

412 Species with a single representative are grey points. Members of one species are coloured

413 (arbitrarily) and connected by lines, demonstrating intraspecific variation in brain shapes along the

414 two main axes of shape variation. Within-species distances compared to among species distances in

415 Procrustes space are shown in Supplementary Fig. 8.

416

417 *Comparison of endocast shape with partition volume evolution, and relationship with histological*

418 *neo/isocortical volumes*

419 By comparison with endocast shape, the relative volumes of the brain partitions have slightly higher

420 phylogenetic signal ( $K_{\text{mult}} = 0.66$ ,  $p=0.001$ ), but have no signal of evolutionary allometry (Table 1). A

421 Mantel test of pairwise distances between species in the shape and volume PCA spaces is significant

422 ( $p=0.000$ , but with low Pearson correlation values of 0.27), confirming our expectation that the two

423 describe different patterns of evolutionary diversification (Fig. 6 shows the distribution of species on

424 a volume-based PCA); for example, the PC1 of volumes shows high loading of olfactory bulb volume  
425 that is not apparent along the main variation of shapes (Fig. 6; supplementary movie 1). However,  
426 because PC2 of endocast shape appeared to reflect volumetric dominance of the cerebrum, and could  
427 possibly be associated with “neocorticalisation”, we ascertained that fossil species (n=12) indeed have  
428 significantly lower PC2 scores than extant species; fossil status explained nearly a fifth of PC2 ( $R^2=0.18$ ;  
429 Table 1)), but note that PC2 itself only explains 12.5% of endocast shape variation. We then assessed  
430 if relative cerebral size (as identified by the log shape ratio value of the cerebrum) was associated with  
431 endocast shape or PC2 of the shape PCA. This revealed a significant association of cerebral partition  
432 volume with shape and PC2 (Table 1), but neither association explained much variation. In keeping  
433 with their significantly smaller PC2 scores, fossil taxa also had significantly smaller cerebra relative to  
434 the remainder of brain partition volumes, and fossil status explained nearly 20% of variation in  
435 cerebral volume (Table 1). However, despite appearing to also have relatively larger PC2 scores and  
436 cerebral partition LSR, diprotodontians did not have significantly higher PC2 scores or Cerebral LSR in  
437 a phylogenetic context (Table 1).

438 We found no dependable association between shape variation, relative volume variation, and  
439 neocortical or isocortical volume. The only significant association we found was a small association  
440 between the log-shape ratios of cerebral hemispheres and neocortex volumes (across 17 species)  
441 (Table 1). Therefore, although cerebral hemisphere partition volume may be indicative of neocortex  
442 volume, this association is not strong and cannot be translated to shape variation.

443

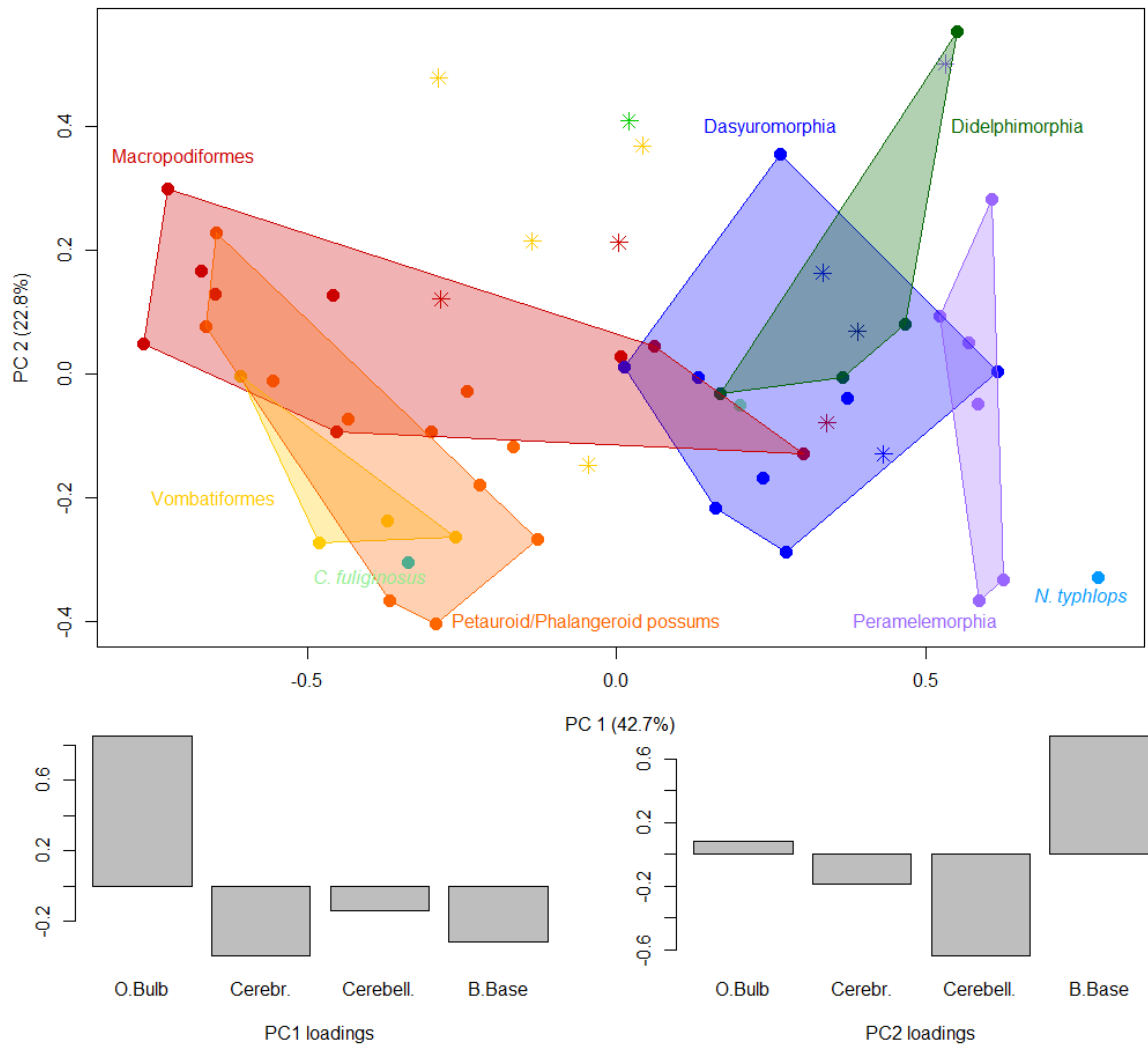

444

445 **Figure 6:** Plot of principal component 1 vs PC2 of species according to their brain region volume (top)

446 and PC1 and PC2 variable loadings (bottom) based on log-shape ratios of four endocast partitions:

447 olfactory bulb [O.bulb], cerebrum [Cerebr.], cerebellum [Cerebell.] and brain base [B.Base]. Note

448 that the main differentiation between species here is due to volumes of the olfactory bulb.

449 Colouration as in Fig. 1 and 2.

450

451

452

453



454 **Discussion**

455

456 Our results reveal that over half of marsupial endocast shape variation lies along a spectrum from  
457 elongate/straight to globular/inclined endocast shapes, which strongly resemble the “spatial packing”  
458 effects proposed for primates and experiments on mice (Ross and Henneberg 1995; Lieberman et al.  
459 2008; Bastir et al. 2011; Marcucio et al. 2011; Zollikofer et al. 2017). However, “spatial packing” was  
460 suggested to accommodate relatively larger brains into skulls with short cranial bases, while the  
461 marsupial pattern is not associated with relative brain size. The spectrum of shapes is also very broad,  
462 ranging from nearly spherical in the marsupial mole *Notoryctes typhlops* to nearly tubular in species  
463 like the fossil vombatiform *Silvabestius johnnili* (compare on Fig.1). This resembles other instances  
464 where an axis of global change related to elongation determines morphological diversification, for  
465 example in the whole body of fishes, lizards, and mustelids (Bergmann and Irschick 2010; Ward and  
466 Mehta 2010; Law et al. 2019). Shape diversification partially associated with elongation has also been  
467 postulated for the therian cranium (e.g. Cardini et al. 2015), although this so-called “Cranial Rule of  
468 Evolutionary Allometry” is also associated with size variation, which has no strong influence in our  
469 dataset.

470 The high variability of endocast shapes across short evolutionary time scales (or even within  
471 species) suggests that the diverse brain tissues within the endocast are integrated to produce a limited  
472 set of shapes reflected in PC1 (Felice et al. 2018). But what determines this strong main axis of  
473 variation? The pattern resembles an evolutionary “line of least resistance” (Schluter 1996), a  
474 genetically favoured direction of morphological evolution. In mammals, strong allometric variation is  
475 often portrayed as a hallmark of such evolutionary lines of least resistance (e.g. Marroig and Cheverud  
476 2005; Marcy et al. 2020). However, the pattern we observe is not necessarily genetic and shows no  
477 strong allometry. In addition, endocasts differ from whole-body or overall cranial shape through the  
478 juncture between the soft tissue of the brain with its neuronal functionality on one hand, and the  
479 osseous skull with its functional diversity on the other.

480 Focusing on the juncture between brain and skull tissue, brain shape is known to be  
481 mechanically malleable. For example, it can be determined by intrinsic mechanical properties (such as  
482 tissue stiffness or internal tension of neurons; Atkinson et al. 2015; Koser et al. 2016; Heuer and Toro  
483 2019), as well as external impacts (e.g. contact with cranial bones during brain growth; Macrini et al.  
484 2007c; Budday et al. 2015). Such impacts are known to change brain shape over short evolutionary  
485 time scales and also individual development (Budday et al. 2015; Gómez-Robles et al. 2015), just as  
486 observed here. Similarly, brain sizes and regional volumes (and therefore presumably their shape) can  
487 vary substantially during individual lifetimes (Burger et al. 2013; Dechmann et al. 2017). Thus,  
488 mechanistic processes may mould brains into default shapes which we see on PC1, but without  
489 representing a “true” constraint because the shape of the brain is not intrinsically fixed. This is also  
490 consistent with our observations of highly unique endocranial shapes. Particularly striking examples  
491 of this are the deep “waist” between the cerebrum and the cerebellum, reflecting a deep imprint of  
492 the highly pneumatized mastoid part of the petrosal of the pygmy glider *Acrobates pygmaeus*, or the  
493 flat brain with imprint of the middle ear cavity in *Planigale ingrami* (compare in Fig. 1)

494 With respect to possible associations between brain shape and skull functionality, neither  
495 allometry or locomotor mode were strongly associated with endocast shape. There are at least two  
496 functional reasons to explain this: First, smaller mammals have relatively larger brains for their body  
497 mass, and would therefore be expected to share common constraints of distributing a heavy brain in  
498 a small skull. In addition, as postulated under the “spatial packing” hypothesis, spatial constraints  
499 might require brains to be packed in a more globular way when their mass increases relative to body  
500 mass. However, allometry is not an important part of brain shape variation (mirroring results from a  
501 study on squirrels and their fossil relatives; Bertrand et al. 2019b) and our “spatial packing” – like  
502 pattern exists without allometry; the much higher phylogenetic signal of centroid size compared to  
503 endocast shape also demonstrates the relative evolutionary independence of the two. We also found  
504 no association of locomotor categories with endocast shape, including a lack of association between  
505 gliding and endocast shape, which contrasts with findings in gliding squirrels (Bertrand et al. 2019b).

506 There is also no obvious connection between facial length and brain globularity (Evans et al. 2017;  
507 Zollikofer et al. 2017): for example, the two most globular brains in the sample belong to the relatively  
508 short-snouted marsupial mole and the relatively long-snouted shrew opossum (see Fig. 2).

509 The lack of functionally explainable pattern of endocast shape can have several  
510 methodological causes related to a relatively broad landmarking protocol, broad locomotor  
511 categories, and the phylogenetically confounded distribution of locomotor mode (for successful,  
512 phylogenetically more restricted analyses of ecology and endocast shape, see Ahrens 2014; Bertrand  
513 et al. 2019b). However, it is also possible that the evolutionary flexibility of brain shape suggested  
514 above, and its apparent propensity to adapt to the braincase, might result in noisy and divergent  
515 adaptations that are statistically not tractable. This also emphasises that interpreting associations  
516 between locomotor mode and endocast shape, as well as possibly many other adaptations such as  
517 feeding biology, require consideration of whether variation is caused by cranial, rather than  
518 somatosensory, adaptation (Jeffery and Spoor 2006). However, it is also possible that the skull is not  
519 always a strong predictor of locomotor mode; for example, the skull shape of kangaroos is not strongly  
520 associated with hopping or different modes of hopping (Butler et al. 2020), possibly explaining why  
521 we also found no significant association between endocasts of hopping vs. non-hopping kangaroos.

522 We find that different descriptions of endocast or brain macromorphology (shape  
523 coordinates, volumetric dissection, and functional region volume such as neocortex) are not  
524 interchangeable in terms of the information they contain. What little significant correspondence we  
525 find (e.g. that overall shape, PC2, and neocortex volume are significantly associated with relative  
526 cerebral hemisphere size) is not sufficient to allow biological conclusions from one measure to the  
527 other. This also appears to be the case with specific somatosensory regions such as the visual cortex,  
528 which occupies the region that expands most along PC2 (Karlen and Krubitzer 2007). An association  
529 between occipital expansion of the neocortex and a potential improvement of vision capabilities has  
530 been suggested in rodents and their relatives (e.g. Bertrand et al. 2019a). In marsupials, however, a

531 previous study (Karlen and Krubitzer 2007) showed no differences in visual cortex area between two  
532 species with high PC2 scores (*Dactylopsila trivirgata* and *Trichosurus vulpecula*) versus species with  
533 low PC2 scores (*Dasyurus hallucatus*, *Monodelphis domestica*, and *Didelphis virginiana*). In addition,  
534 the marsupial mole *Notoryctes typhlops* with its dorsally rounded cerebral hemispheres (Fig. 1) has no  
535 functional eyes (Van Dyck and Strahan 2008).

536 Fossil species have significantly smaller relative cerebral size and PC2 scores than their living  
537 relatives, which superficially supports the notion of increasing neocortex dominance  
538 (“neocorticalisation”) in mammals (Jerison 2012), and specifically marsupial (Haight and Murray  
539 1981), evolution. However, very weak associations between shape, cerebral, and histological cortical  
540 volumes suggest that surface area measurements (Jerison 1973; Bertrand et al. 2016) on a sample  
541 where these measurements can be made with confidence will be required to clarify this effect.

542 Phylogenetic divisions in brain shape have been successfully established at finer phylogenetic  
543 scales (e.g. Silcox et al. 2009; Thiery and Ducrocq 2015; Bertrand et al. 2016; Bertrand et al. 2019b).  
544 We also find moderate phylogenetic signal in brain shape. However, this differentiation is  
545 concentrated on the second principal component and explains little shape variation (compare the  
546 mean shapes with the shapes of individual species in Fig. 1 or supplementary Figure 5). Brain shape is,  
547 therefore, likely too ambiguous to be useful in marsupial phylogenetics, with anatomical scores that  
548 reflect the internal bony surface likely more successful (Haight and Murray 1981; Macrini et al. 2007b).

549

## 550 **Conclusions**

551 High evolutionary shape plasticity along a global axis of elongation emerges as a powerful mechanism  
552 of balancing the evolution of marsupial, and possibly mammalian, cranial function against the need to  
553 accommodate the brain. However, the precise mechanisms for this flexibility remain to be understood  
554 and are likely quite diverse. For example, on one hand, brain shape and volume proportions can

555 undergo drastic seasonal change in some small mammals (Dechmann et al. 2017). On the other hand,  
556 dogs bred for specific, small cranial vault shapes can display pathological cerebellar compression  
557 (Hechler and Moore 2018). Lastly, over the large time scales of mammalian brain evolution, increases  
558 in brain size appear to have triggered cranial vault expansion through a heterochronic delay in  
559 ossification of the cranial roof (Koyabu et al. 2014). The main challenge for understanding how the  
560 mammalian brain co-evolves with the skull will therefore be in separating the effects of individual  
561 developmental flexibility of brain shape on one hand, and deep time co-evolution between the cranial  
562 vault and brain size on the other, in a broader sample of non-primate mammals.

563

564

565

566

567

568

569

570

571

572

573

574

575

576 **Author contributions:**

577 VW conceived of the study, performed most of the endocasting, co-analysed the data, and wrote the  
578 manuscript. TR, SW, TEM, KJT, KB, MA, SH, JB, RMDB, SL, AS, provided specimen scans, co-wrote the  
579 manuscript, and co-developed the palaeontological aspects of the study. RMDB produced the  
580 phylogenies. KG participated in endocasting and most of the endocast dissections, and co-developed  
581 the dissection protocol. KM scanned a proportion of specimens, and co-wrote the manuscript. ES  
582 developed most R code, co-analysed the data, and co-wrote the manuscript.

583

584 **Acknowledgements:**

585 This research was funded by an Australian Research Council Discovery Early Career Award  
586 (DE120102034), Discovery Project DP170103227, and Future Fellowship FT180100634 to V.W;  
587 ARC DP170101420 to MA and SJH; ATM MNHN 'Biodiversité actuelle et fossile' to S.L.; and a  
588 University of Adelaide Fellowship to E.S. Scans provided by the Digimorph platform were funded by  
589 National Science Foundation (NSF) IIS 9874781 and IIS 0208675 (TR), and several scans were done by  
590 T.M. under NSF DEB 9873663 (Nancy Simmons, AMNH) and NSF DEB 0309369 (Rowe and Macrini).  
591 For involvement in the collection of the fossils, we thank P. Creaser and the CREATE Fund, K. and M.  
592 Pettit, the University of New South Wales, Environment Australia, Queensland Parks and Wildlife  
593 Service, Outback at Isa, Mount Isa City Council, The Riversleigh Society and the Waanyi people. We  
594 thank the late Simon Collins (School Veterinary Science, UWQ) and Stephen Johnston (School of  
595 Agricultural and food Sciences, UQ) for making available CT scans of two *Phascolarctos cinereus*. We  
596 thank Candi Wong and Narelle Hill for support with endocast segmentation and dissection. The  
597 authors acknowledge the facilities and scientific and technical assistance of the National Imaging  
598 Facility, a National Collaborative Research Infrastructure Strategy (NCRIS) capability, at the Centre for  
599 Advanced Imaging, University of Queensland. We thank Materialise Malaysia for assistance with

600 endocast preparation in Mimics. This study was mostly conducted on the traditional lands of the  
601 Yuggera (Brisbane) and Kurna (Adelaide) people.

602

603 **Data Availability:**

604 All endocasts are available on Figshare: For the original stl files and endocast dissections, the doi is  
605 <http://10.0.23.196/m9.figshare.12284456>). For ply files used for automatic landmark placement, the  
606 doi is <http://10.0.23.196/m9.figshare.12284456>. The full R code for data read-in, analysis, and Figures,  
607 including, auxiliary files, volume data, and landmark coordinate data are available in github repository  
608 [https://github.com/VWeisbecker/Brain\\_shape\\_study](https://github.com/VWeisbecker/Brain_shape_study) (see README instructions there).

609

610 **References**

- 611 Adams, D., M. Collyer, and A. Kaliontzopoulou. 2020. Geomorph: Geometric Morphometric Analyses  
612 of 2D/3D Landmark Data. Version 3.2.1. R package.
- 613 Adams, D. C. 2014a. A generalized K statistic for estimating phylogenetic signal from shape and other  
614 high-dimensional multivariate data. *Syst. Biol.* **63**:685-697.
- 615 Adams, D. C. 2014b. A method for assessing phylogenetic least squares models for shape and other  
616 high-dimensional multivariate data. *Evolution* **68**:2675-2688.
- 617 Ahrens, H. E. 2014. Morphometric study of phylogenetic and ecologic signals in procyonid  
618 (Mammalia: Carnivora) endocasts. *Anat. Rec.* **297**:2318-2330.
- 619 Argot, C. 2003. Functional adaptations of the postcranial skeleton of two Miocene borhyaenoids  
620 (Mammalia, Metatheria), *Borhyaena* and *Prothylacinus*, from South America. *Palaeontology*  
621 **46**:1213-1267.
- 622 Aristide, L., S. F. dos Reis, A. C. Machado, I. Lima, R. T. Lopes, and S. I. Perez. 2016. Brain shape  
623 convergence in the adaptive radiation of New World monkeys. *Proc. Natl. Acad. Sci. U.S.A.*  
624 **113**:2158-2163.
- 625 Ashwell, K. 2010. *The neurobiology of Australian marsupials: brain evolution in the other mammalian*  
626 *radiation*. Cambridge University Press.
- 627 Atkinson, E. G., J. Rogers, M. C. Mahaney, L. A. Cox, and J. M. Cheverud. 2015. Cortical folding of the  
628 primate brain: An interdisciplinary examination of the genetic architecture, modularity, and  
629 evolvability of a significant neurological trait in pedigreed baboons (genus *Papio*). *Genetics*  
630 **200**:651.
- 631 Barton, R. A. and I. Capellini. 2011. Maternal investment, life histories, and the costs of brain growth  
632 in mammals. *Proc. Natl. Acad. Sci. U.S.A.* **108**:6169.
- 633 Bastir, M., A. Rosas, P. Gunz, A. Peña-Melian, G. Manzi, K. Harvati, R. Kruszynski, C. Stringer, and J.-J.  
634 Hublin. 2011. Evolution of the base of the brain in highly encephalized human species.  
635 *Nature Commun.* **2**:588.



- 636 Beck, R. M., K. J. Travouillon, K. P. Aplin, H. Godthelp, and M. Archer. 2014. The osteology and  
637 systematics of the enigmatic australian oligo-miocene metatherian *Yalkaparidon*  
638 (*Yalkaparidontidae*; *Yalkaparidontia*? Australidelphia; Marsupialia). *J. Mamm. Evol.* **21**:127-  
639 172.
- 640 Bennett, P. M. and P. H. Harvey. 1985. Brain size, development and metabolism in birds and  
641 mammals. *J. Zool.* **207**:491-509.
- 642 Bergmann, P. J. and D. J. Irschick. 2010. Alternate pathways of body shape evolution translate into  
643 common patterns of locomotor evolution in two clades of lizards. *Evolution* **64**:1569-1582.
- 644 Bertrand, O., C., F. Amador-Mughal, and T. Silcox Mary. 2016. Virtual endocasts of Eocene Paramys  
645 (*Paramyinae*): oldest endocranial record for Rodentia and early brain evolution in  
646 Euarchontoglires. *Proc. Royal Soc. B* **283**:20152316.
- 647 Bertrand, O. C., F. Amador-Mughal, M. M. Lang, and M. T. Silcox. 2019a. New virtual endocasts of  
648 Eocene Ischyromyidae and their relevance in evaluating neurological changes occurring  
649 through time in Rodentia. *J. Mamm. Evol.* **26**:345-371.
- 650 Bertrand, O. C., G. San Martin-Flores, and M. T. Silcox. 2019b. Endocranial shape variation in the  
651 squirrel-related clade and their fossil relatives using 3D geometric morphometrics:  
652 contributions of locomotion and phylogeny to brain shape. *J. Zool.* **308**:197-211.
- 653 Biegert, J. 1957. Der Formwandel des Primatenschädels und seine Beziehungen zur ontogenetischen  
654 Entwicklung und den phylogenetischen Spezialisierungen des Kopforgans. *Morphol. Jahrb.*  
655 **98**:77-199.
- 656 Bienvenu, T., F. Guy, W. Coudyzer, E. Gilissen, G. Roualdès, P. Vignaud, and M. Brunet. 2011.  
657 Assessing endocranial variations in great apes and humans using 3D data from virtual  
658 endocasts. *Am. J. Phys. Anthr.* **145**:231-246.
- 659 Black, K. H., A. B. Camens, M. Archer, and S. J. Hand. 2012. Herds Overhead: *Nimbadon*  
660 *lavarackorum* (*Diprotodontidae*), heavyweight marsupial herbivores in the Miocene forests  
661 of Australia. *PLoS ONE* **7**:e48213.

- 662 Budday, S., P. Steinmann, A. Goriely, and E. Kuhl. 2015. Size and curvature regulate pattern selection  
663 in the mammalian brain. *Extreme Mech. Lett.* **4**:193-198.
- 664 Burger, D. K., J. M. Saucier, A. N. Iwaniuk, and D. M. Saucier. 2013. Seasonal and sex differences in  
665 the hippocampus of a wild rodent. *Behav. Brain. Res.* **236**:131-138.
- 666 Butler, K., K. J. Travouillon, A. R. Evans, L. Murphy, G. J. Price, M. Archer, S. J. Hand, and V.  
667 Weisbecker. 2020. 3d morphometric analysis reveals similar ecomorphs for early kangaroos  
668 (Macropodidae) and fanged kangaroos (Balbaridae) from the Riversleigh World Heritage  
669 Area, Australia. *J. Mamm. Evol.*:1-21.
- 670 Cardini, A., D. Polly, R. Dawson, and N. Milne. 2015. Why the Long Face? Kangaroos and Wallabies  
671 Follow the Same 'Rule' of Cranial Evolutionary Allometry (CREA) as Placentals. *Evol. Biol.*  
672 **42**:169-176.
- 673 Dechmann, D. K. N., S. LaPoint, C. Dullin, M. Hertel, J. R. E. Taylor, K. Zub, and M. Wikelski. 2017.  
674 Profound seasonal shrinking and regrowth of the ossified braincase in phylogenetically  
675 distant mammals with similar life histories. *Scientif. Rep.* **7**:42443.
- 676 Den Boer, W., N. E. Campione, and B. P. Kear. 2019. Climbing adaptations, locomotory disparity and  
677 ecological convergence in ancient stem 'kangaroos'. *Roy. Soc. Open Sci.* **6**:181617.
- 678 Dos Santos, S. E., J. Porfirio, F. B. da Cunha, P. R. Manger, W. Tavares, L. Pessoa, M. A. Raghanti, C. C.  
679 Sherwood, and S. Herculano-Houzel. 2017. Cellular scaling rules for the brains of marsupials:  
680 Not as "primitive" as expected. *Brain Behav. Evol.* **89**:48-63.
- 681 Drake, A. G. and C. P. Klingenberg. 2008. The pace of morphological change: Historical  
682 transformation of skull shape in St Bernard dogs. *Proc. Roy. Soc. Lond. B* **275**:71-76.
- 683 Eldridge, M. D. B., R. M. D. Beck, D. A. Croft, K. J. Travouillon, and B. J. Fox. 2019. An emerging  
684 consensus in the evolution, phylogeny, and systematics of marsupials and their fossil  
685 relatives (Metatheria). *J. Mammal.* **100**:802-837.
- 686 Evans, K. M., B. T. Waltz, V. A. Tagliacollo, B. L. Sidlauskas, and J. S. Albert. 2017. Fluctuations in  
687 Evolutionary Integration Allow for Big Brains and Disparate Faces. *Scientif. Rep.* **7**:40431.

- 688 Felice, R. N., M. Randau, and A. Goswami. 2018. A fly in a tube: Macroevolutionary expectations for  
689 integrated phenotypes. *Evolution* **72**:2580-2594.
- 690 Gómez-Robles, A., W. D. Hopkins, S. J. Schapiro, and C. C. Sherwood. 2015. Relaxed genetic control  
691 of cortical organization in human brains compared with chimpanzees. *Proc. Natl. Acad. Sci.*  
692 *U.S.A.* **112**:14799-14804.
- 693 Gould, S. J. 1977. *Ontogeny and phylogeny*. Harvard University Press.
- 694 Gunz, P., P. Mitteroecker, and F. L. Bookstein. 2005. Semilandmarks in three dimensions *in* D. Slice,  
695 ed. *Modern Morphometrics in Physical Anthropology*. Kluwer Academic, New York.
- 696 Haight, J. R. and P. F. Murray. 1981. The cranial endocast of the early miocene marsupial, *Wynyardia*  
697 *bassiana*: An assessment of taxonomic relationships based upon comparisons with recent  
698 forms. *Brain Behav. Evol.* **19**:17-36.
- 699 Hanken, J. and P. Thorogood. 1993. Evolution and development of the vertebrate skull: The role of  
700 pattern formation. *Trends Ecol. Evol.* **8**:9-15.
- 701 Hechler, A. C. and S. A. Moore. 2018. Understanding and treating chiari-like malformation and  
702 syringomyelia in dogs. *Topics Com. Anim. Med.* **33**:1-11.
- 703 Heuer, K. and R. Toro. 2019. Role of mechanical morphogenesis in the development and evolution of  
704 the neocortex. *Phys. Life Rev.*
- 705 Hinds, L. A. 1988. Hormonal control of lactation. Pp. 55-67 *in* C. H. Tyndale-Biscoe, and P. A.  
706 Janssens, eds. *The Developing Marsupial. Models for Biomedical Research*. Springer, Berlin.
- 707 Jeffery, N. and F. Spoor. 2006. The primate subarcuate fossa and its relationship to the semicircular  
708 canals part I: prenatal growth. *J. Hum. Evol.* **51**:537-549.
- 709 Jerison, H. J. 1973. *Evolution of Brain and Intelligence*. Academic Press, London.
- 710 Jerison, H. J. 2012. Digitized fossil brains: neocorticalization. *J. Bioling.* **6**:383-392.
- 711 Jyothilakshmi, T. K., Y. Gurovich, and K. W. S. Ashwell. 2020. Numerical analysis of the cerebral  
712 cortex in diprotodontids (Marsupialia; Australidelphia) and comparison with eutherian  
713 brains. *Zoology* **143**:125845.

- 714 Karlen, S. J. and L. Krubitzer. 2007. The functional and anatomical organization of marsupial  
715 neocortex: Evidence for parallel evolution across mammals. *Prog. Neurobiol.* **82**:122-141.
- 716 Klingenberg, C. P., M. Barluenga, and A. Meyer. 2002. Shape analysis of symmetric structures:  
717 Quantifying variation among individuals and asymmetry. *Evolution* **56**:1909-1920.
- 718 Koser, D. E., A. J. Thompson, S. K. Foster, A. Dwivedy, E. K. Pillai, G. K. Sheridan, H. Svoboda, M.  
719 Viana, L. d. F. Costa, J. Guck, C. E. Holt, and K. Franze. 2016. Mechanosensing is critical for  
720 axon growth in the developing brain. *Nature Neurosci.* **19**:1592.
- 721 Koyabu, D., I. Werneburg, N. Morimoto, C. P. E. Zollikofer, A. M. Forasiepi, H. Endo, J. Kimura, S. D.  
722 Ohdachi, N. Truong Son, and M. R. Sánchez-Villagra. 2014. Mammalian skull heterochrony  
723 reveals modular evolution and a link between cranial development and brain size. *Nature*  
724 *Commun.* **5**.
- 725 Law, C. J., G. J. Slater, and R. S. Mehta. 2019. Shared extremes by ectotherms and endotherms: Body  
726 elongation in mustelids is associated with small size and reduced limbs. *Evolution* **73**:735-  
727 749.
- 728 Lieberman, D. E., B. Hallgrímsson, W. Liu, T. E. Parsons, and H. A. Jamniczky. 2008. Spatial packing,  
729 cranial base angulation, and craniofacial shape variation in the mammalian skull: testing a  
730 new model using mice. *J. Anat.* **212**:720-735.
- 731 Macrini, T. E., C. De Muizon, R. L. Cifelli, and T. Rowe. 2007a. Digital cranial endocast of *Pucadelphys*  
732 *andinus*, a Paleocene metatherian. *J. Vert. Paleontol.* **27**:99-107.
- 733 Macrini, T. E., G. W. Rougier, and T. Rowe. 2007b. Description of a cranial endocast from the fossil  
734 mammal *Vincelestes neuquenianus* (theriiformes) and its relevance to the evolution of  
735 endocranial characters in therians. *Anat. Rec.* **290**:875-892.
- 736 Macrini, T. E., T. Rowe, and J. L. VandeBerg. 2007c. Cranial endocasts from a growth series of  
737 *Monodelphis domestica* (Didelphidae, Marsupialia): a study of individual and ontogenetic  
738 variation. *J. Morphol.* **268**:844-865.

- 739 Maier, W. 1993. Cranial morphology of the therian common ancestor, as suggested by the  
740 adaptations of neonate marsupials. Pp. 165-181 in F. S. Szalay, M. J. Novacek, and M. C.  
741 McKenna, eds. *Mammal Phylogeny: Mesozoic Differentiation, Multituberculates,*  
742 *Monotremes, Early Therians, and Marsupials*. Springer New York, New York, NY.
- 743 Marcucio, R. S., N. M. Young, D. Hu, and B. Hallgrímsson. 2011. Mechanisms that underlie co-  
744 variation of the brain and face. *Genesis* **49**:177-189.
- 745 Marcy, A. E., T. Guillerme, E. Sherratt, K. C. Rowe, M. J. Phillips, and V. Weisbecker. 2020. Australian  
746 Rodents Reveal Conserved Cranial Evolutionary Allometry across 10 Million Years of Murid  
747 Evolution. *Am. Nat.*:000-000.
- 748 Marroig, G. and J. M. Cheverud. 2005. Size as a line of least evolutionary resistance: Diet and  
749 adaptive morphological radiation in new world monkeys. *Evolution* **59**:1128-1142.
- 750 Mosimann, J. E. 1970. Size allometry: size and shape variables with characterizations of the  
751 lognormal and generalized gamma distributions. *J. Am. Stat. Assoc.* **65**:930-945.
- 752 Mota, B. and S. Herculano-Houzel. 2015. Cortical folding scales universally with surface area and  
753 thickness, not number of neurons. *Science* **349**:74-77.
- 754 Nieman, B. J., M. C. Blank, B. B. Roman, R. M. Henkelman, and K. J. Millen. 2012. If the skull fits:  
755 magnetic resonance imaging and microcomputed tomography for combined analysis of  
756 brain and skull phenotypes in the mouse. *Physiol. Genom.* **44**:992.
- 757 Nowak, R. M. 2018. *Walker's mammals of the world: monotremes, marsupials, afrotherians,*  
758 *xenarthrans, and sundatherians*. Johns Hopkins University Press.
- 759 Oksanen, J., F. G. Blanchet, R. Kindt, P. Legendre, P. R. Minchin, R. B. O'Hara, G. L. Simpson, P.  
760 Solymos, M. H. H. Stevens, and H. Wagner. 2016. VEGAN-Community Ecology Package.
- 761 Palomero-Gallagher, N. and K. Zilles. 2015. Chapter 22 - Isocortex. Pp. 601-625 in G. Paxinos, ed. *The*  
762 *Rat Nervous System (Fourth Edition)*. Academic Press, San Diego.
- 763 Paradis, E., J. Claude, and K. Strimmer. 2004. APE: analyses of phylogenetics and evolution in R  
764 language. *Bioinformatics* **20**:289-290.

- 765 Pereira-Pedro, A. S. and E. Bruner. 2018. Landmarking Endocasts. Pp. 127-142 in E. Bruner, N.  
766 Ogihara, and H. C. Tanabe, eds. *Digital Endocasts: From Skulls to Brains*. Springer Japan,  
767 Tokyo.
- 768 Pirlot, P. 1981. A quantitative approach to the marsupial brain in an eco-ethological perspective. *Rev.*  
769 *Can. Biol.* **40**:229-250.
- 770 R core team. 2018. R: A Language and Environment for Statistical Computing. R Foundation for  
771 Statistical Computing, Vienna, Australia.
- 772 Richtsmeier, J. T. and K. Flaherty. 2013. Hand in glove: brain and skull in development and  
773 dysmorphogenesis. *Acta Neuropath.* **125**:469-489.
- 774 Rohlf, F. J. and D. Slice. 1990. Extensions of the Procrustes method for the optimal superimposition  
775 of landmarks. *Syst. Zool.* **39**:40-59.
- 776 Ross, C. and M. Henneberg. 1995. Basicranial flexion, relative brain size, and facial kyphosis in Homo  
777 sapiens and some fossil hominids. *Am. J. Phys. Anthr.* **98**:575-593.
- 778 Ross, C. F. and M. J. Ravosa. 1993. Basicranial flexion, relative brain size, and facial kyphosis in  
779 nonhuman primates. *Am. J. Phys. Anthr.* **91**:305-324.
- 780 Rowe, T. B., T. E. Macrini, and Z.-X. Luo. 2011. Fossil evidence on origin of the mammalian brain.  
781 *Science* **332**:955-957.
- 782 Russo, G. A. and E. C. Kirk. 2013. Foramen magnum position in bipedal mammals. *J. Hum. Evol.*  
783 **65**:656-670.
- 784 Sakai, S. T., B. M. Arsznov, A. E. Hristova, E. J. Yoon, and B. L. Lundrigan. 2016. Big cat coalitions: A  
785 comparative analysis of regional brain volumes in Felidae. **10**.
- 786 Sakai, S. T., B. Whitt, B. M. Arsznov, and B. L. Lundrigan. 2018. Endocranial development in the  
787 coyote (*Canis latrans*) and Gray Wolf (*Canis lupus*): A computed tomographic study. *Brain*  
788 *Behav. Evol.* **91**:65-81.

- 789 Sansalone, G., K. Allen, J. A. Ledogar, S. Ledogar, D. R. Mitchell, A. Profico, S. Castiglione, M.  
790 Melchionna, C. Serio, A. Mondanaro, P. Raia, and S. Wroe. 2020. Variation in the strength of  
791 allometry drives rates of evolution in primate brain shape. *Proc. Royal Soc. B* **287**:20200807.
- 792 Schluter, D. 1996. Adaptive radiation along genetic lines of least resistance. *Evolution* **50**:1766-1774.
- 793 Schneider, C. A., W. S. Rasband, and K. W. Eliceiri. 2012. NIH Image to ImageJ: 25 years of image  
794 analysis. *Nature Methods* **9**:671-675.
- 795 Sharp, A. C. 2016. A quantitative comparative analysis of the size of the frontoparietal sinuses and  
796 brain in vombatiform marsupials. *Mem. Mus. Vic.*
- 797 Sherratt, E., D. J. Gower, C. P. Klingenberg, and M. Wilkinson. 2014. Evolution of cranial shape in  
798 caecilians (Amphibia: Gymnophiona). *Evol. Biol.* **41**:528-545.
- 799 Silcox, M. T., C. K. Dalmyn, and J. I. Bloch. 2009. Virtual endocast of *Ignacius graybullianus*  
800 (Paromomyidae, Primates) and brain evolution in early primates. *Proc. Natl. Acad. Sci. U.S.A.*
- 801 Smith, K. K. 1997. Comparative patterns of craniofacial development in eutherian and metatherian  
802 mammals. *Evolution* **51**:1663-1678.
- 803 Thiery, G. and S. Ducrocq. 2015. Endocasts and brain evolution in Anthracotheriidae (Artiodactyla,  
804 Hippopotamoidea). *J. Anat.* **227**:277-285.
- 805 Travouillon, K. J., S. Legendre, M. Archer, and S. J. Hand. 2009. Palaeoecological analyses of  
806 Riversleigh's Oligo-Miocene sites: Implications for Oligo-Miocene climate change in  
807 Australia. *Palaeogeogr., Palaeoclimat. Palaeoecol.* **276**:24-37.
- 808 Turney, C. S. M., T. F. Flannery, R. G. Roberts, C. Reid, L. K. Fifield, T. F. G. Higham, Z. Jacobs, N.  
809 Kemp, E. A. Colhoun, R. M. Kalin, and N. Ogle. 2008. Late-surviving megafauna in Tasmania,  
810 Australia, implicate human involvement in their extinction. *Proc. Natl. Acad. Sci. U.S.A.*  
811 **105**:12150-12153.
- 812 Van Dyck, S. and R. Strahan. 2008. *The Mammals of Australia*. New Holland Pub Pty Limited, Sydney,  
813 Australia.

- 814 Ward, A. B. and R. S. Mehta. 2010. Axial elongation in fishes: Using morphological approaches to  
815 elucidate developmental mechanisms in studying body shape. *Int. Comp. Biol.* **50**:1106-1119.
- 816 Weisbecker, V., K. Ashwell, and D. Fisher. 2013. An improved body mass dataset for the study of  
817 marsupial brain size evolution. *Brain Behav. Evol.* **82**:81-82.
- 818 Weisbecker, V., S. Blomberg, A. W. Goldizen, M. Brown, and D. Fisher. 2015. The evolution of  
819 relative brain size in marsupials is energetically constrained but not driven by behavioral  
820 complexity. *Brain Behav. Evol.* **85**:125-135.
- 821 Weisbecker, V. and A. Goswami. 2010. Brain size, life history, and metabolism at the  
822 marsupial/placental dichotomy. *Proc. Natl. Acad. Sci. U.S.A.* **107**:16216-16221.
- 823 Weisbecker, V. and A. Goswami. 2011a. Marsupials indeed confirm an ancestral mammalian pattern:  
824 A reply to Isler. *BioEssays* **33**:358-361.
- 825 Weisbecker, V. and A. Goswami. 2011b. Neonatal maturity as the key to understanding brain size  
826 evolution in homeothermic vertebrates. *BioEssays* **33**:155-158.
- 827 Weisbecker, V., C. Speck, and A. M. Baker. 2019. A tail of evolution: evaluating body length, weight  
828 and locomotion as potential drivers of tail length scaling in Australian marsupial mammals.  
829 *Zool. J. Linn. Soc.*
- 830 Weisbecker, V., C. Speck, and A. M. Baker. 2020. A tail of evolution: evaluating body length, weight  
831 and locomotion as potential drivers of tail length scaling in Australian marsupial mammals.  
832 *Zool. J. Linn. Soc* **188**:242-254.
- 833 Wiley, D. 2015. Stratovan Checkpoint.
- 834 Wroe, S., M. Crowther, J. Dortch, and J. Chong. 2004. The size of the largest marsupial and why it  
835 matters. *Proc. Roy. Soc. B* **271**:S34-S36.
- 836 Wroe, S., T. J. Myers, R. T. Wells, and A. Gillespie. 1999. Estimating the weight of the Pleistocene  
837 marsupial lion, *Thylacoleo carnifex* (Thylacoleonidae:Marsupialia): implications for the  
838 ecomorphology of a marsupial super-predator and hypotheses of impoverishment of  
839 Australian marsupial carnivore faunas. *Aust. J. Zool.* **47**:489-498.



840 Zelditch, M. L., D. L. Swiderski, and H. D. Sheets. 2012. *Geometric Morphometrics for Biologists: A*

841 *Primer*. Academic Press, New York.

842 Zollikofer, C. P. E., T. Bienvenu, and M. S. Ponce de León. 2017. Effects of cranial integration on

843 hominid endocranial shape. *J. Anat.* **230**:85-105.

844

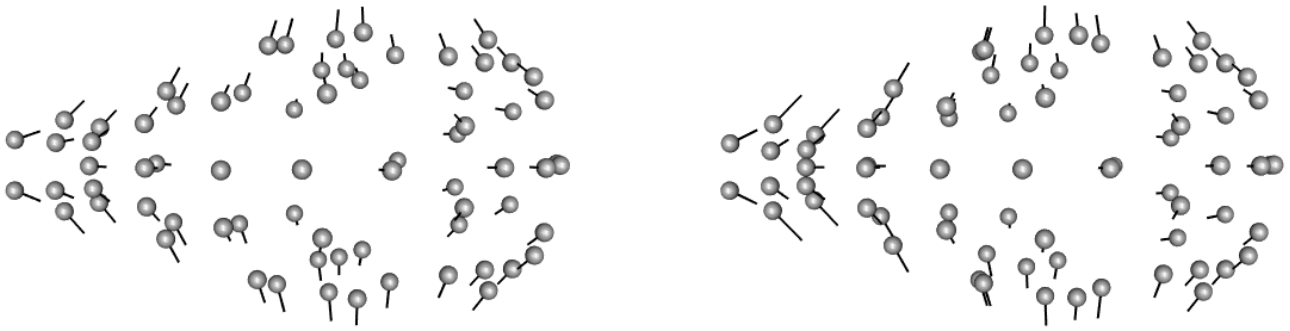

**Supplementary Figure 1:** Landmark displacement graphs of ordinated endocast shape for landmark coordinates with surface semilandmarks automatically placed (left) and manually placed (right) along the first Principal Component (PC1), showing the displacement of landmarks from the extreme shape associated with PC1 minimum scores (grey spheres) to the mean shape (end of hairlines). This comparison is on the full dataset without symmetry removal or averaging of specimens within a species.

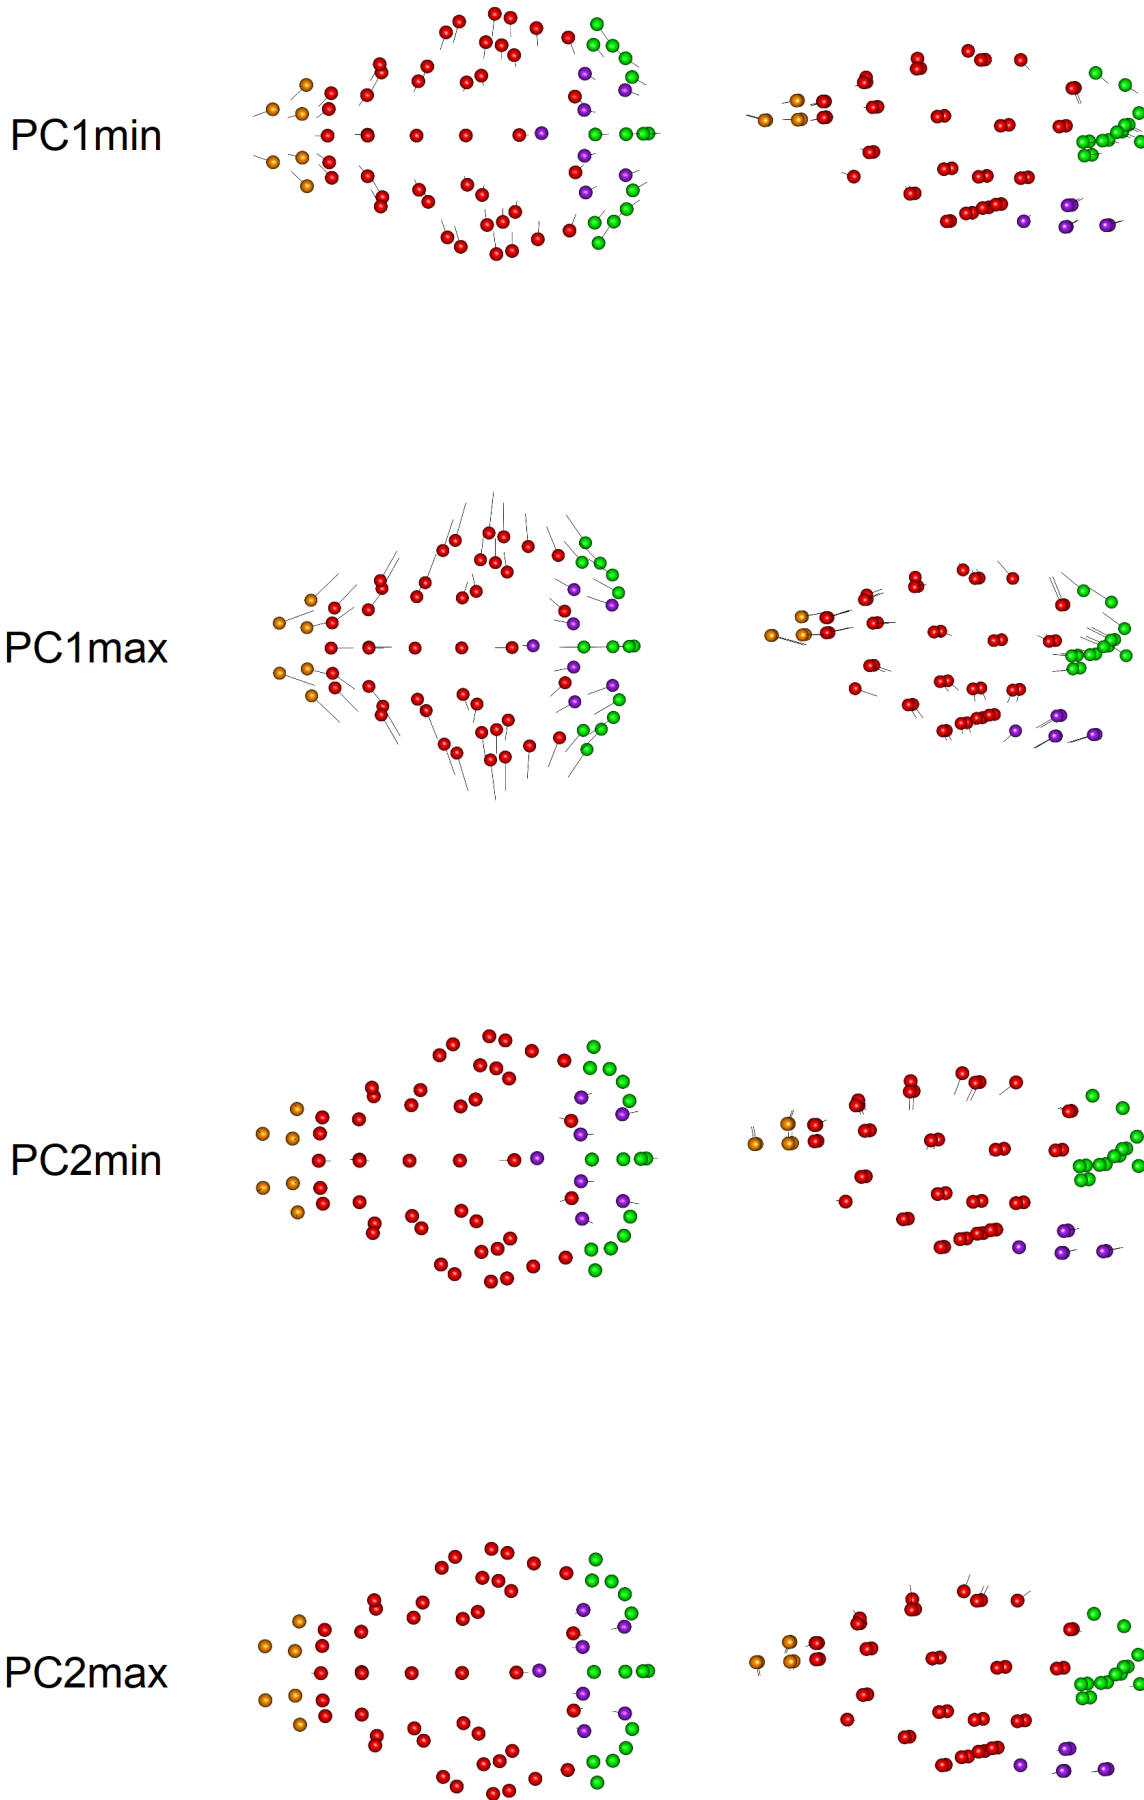

**Supplementary Figure 2:** Landmark displacement graphs of shape variation along PC1 and PC2, with the mean shape as reference (spheres) and the “hairs” of the vectors pointing to Principal Components score extremes for PC1 and PC2.

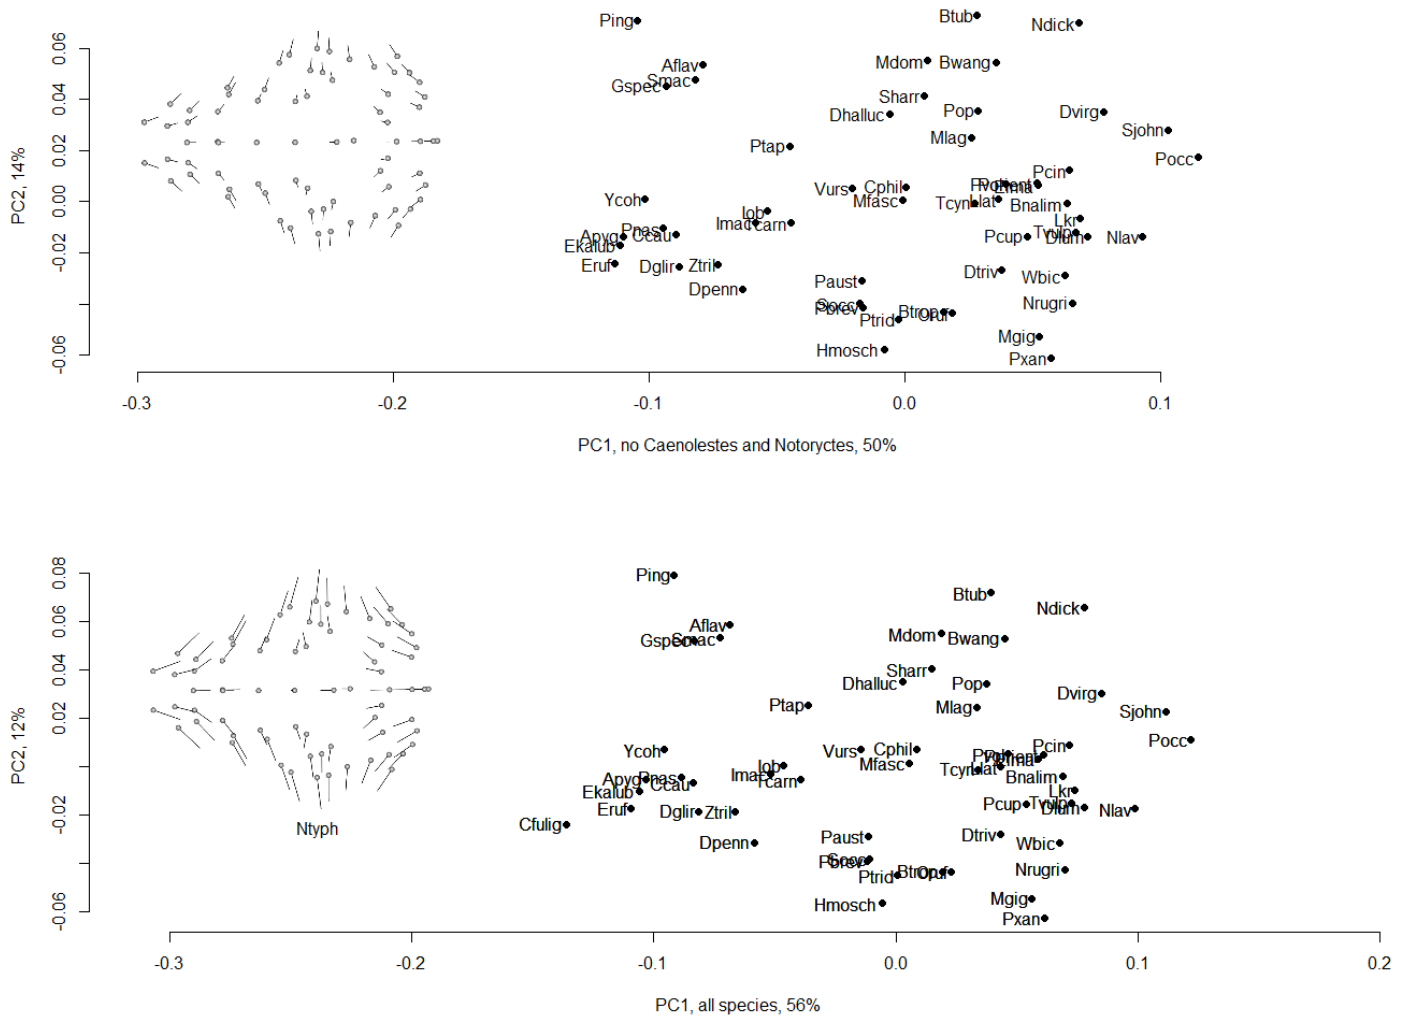

**Supplementary Figure 3** Principal Components (PC) plots of species with (bottom) and without (top) the two highly spherical endocasts of the marsupial mole, *Notoryctes typhlops*, and the shrew-opossum, *Caenolestes fuliginosus*. Note that the removal of these two species caused species to have very similar relative positions, but switched PC1 score signs; the signs of the PC1 scores in the plot including all species (bottom) were therefore also switched to facilitate comparison.

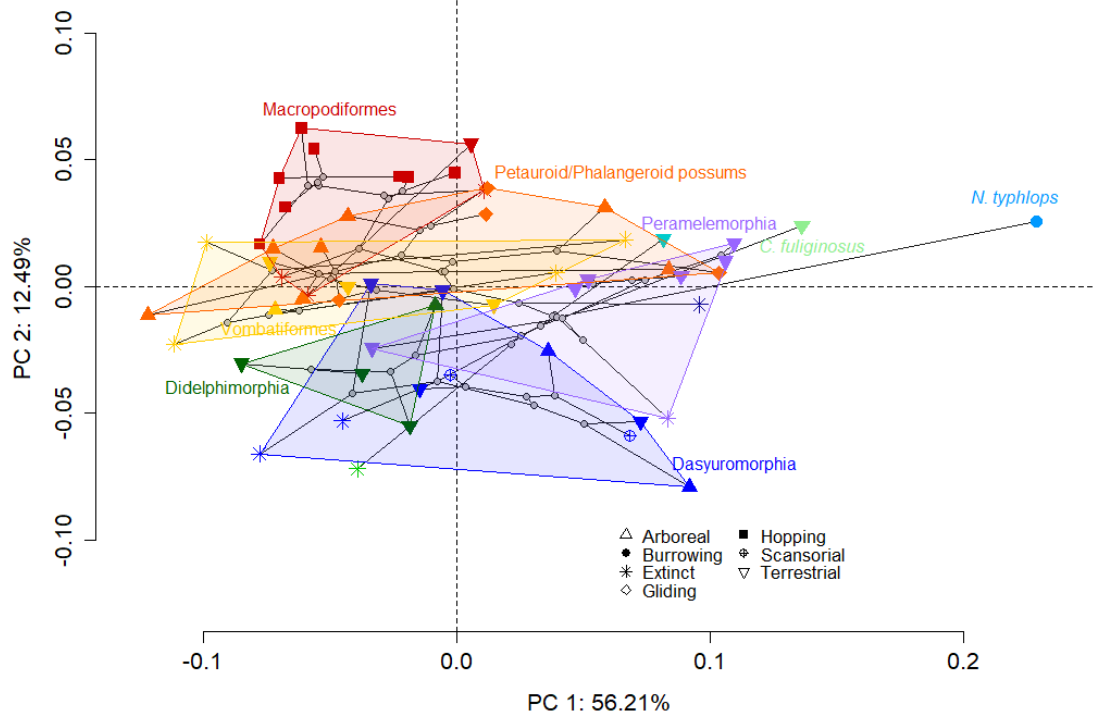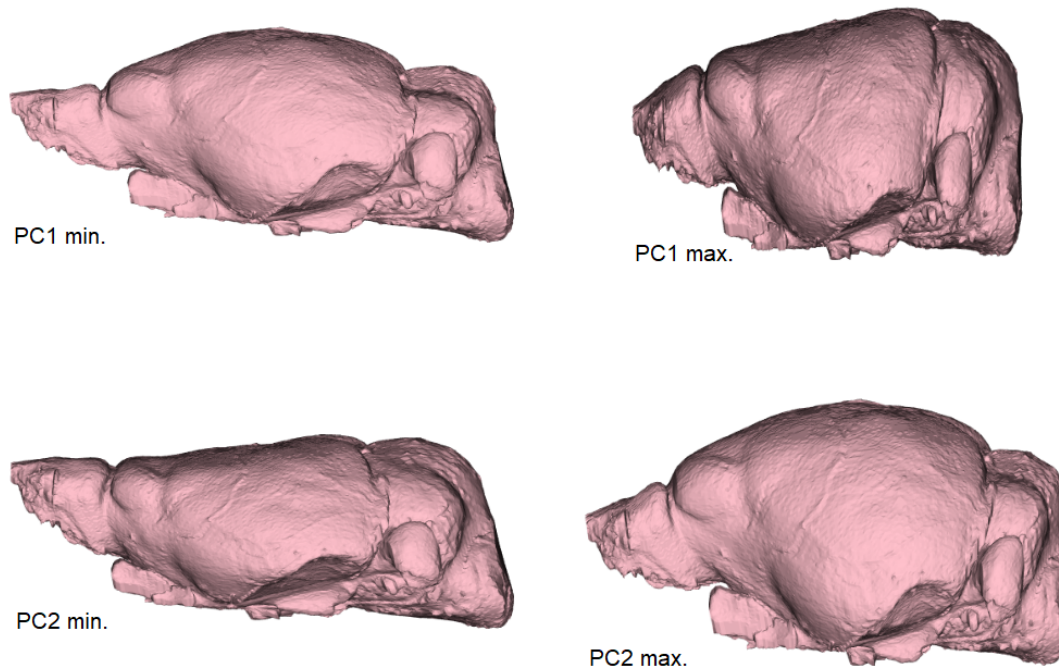

**Supplementary Figure 4:** Plot of principal component 1 vs PC2 for 57 species of marsupials according to their brain shape (top) and corresponding shape variation illustrated as warped endocasts representing the highest and lowest PC1 and 2 scores (bottom). Polygons are drawn around living members of all major clades and their extinct relatives. Stars represent extinct species.

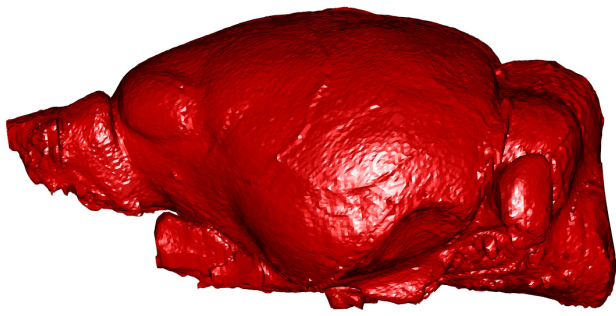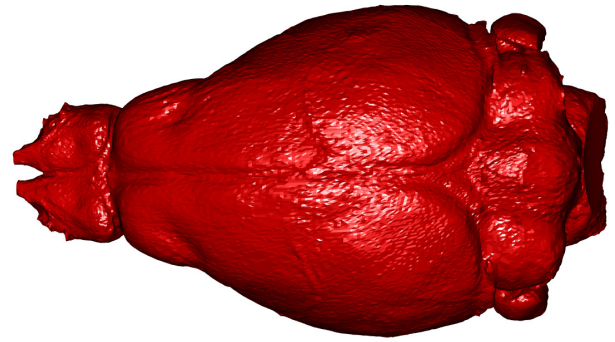

**Macropodiformes**

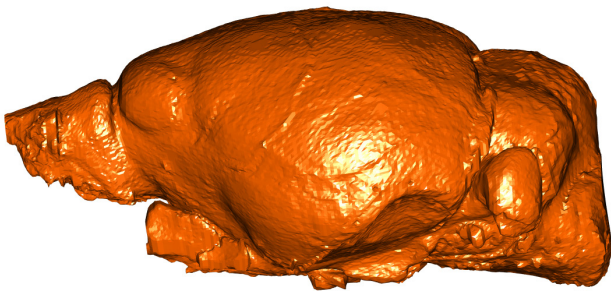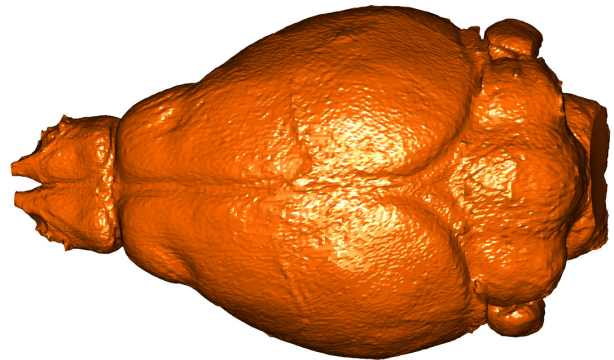

**Petauroidea**

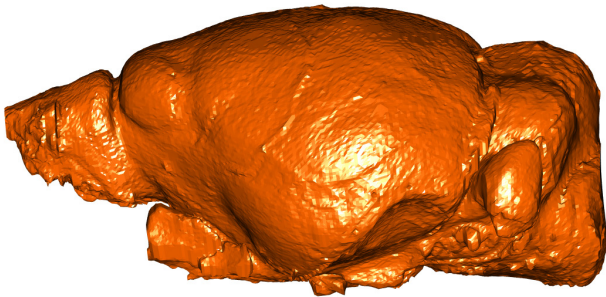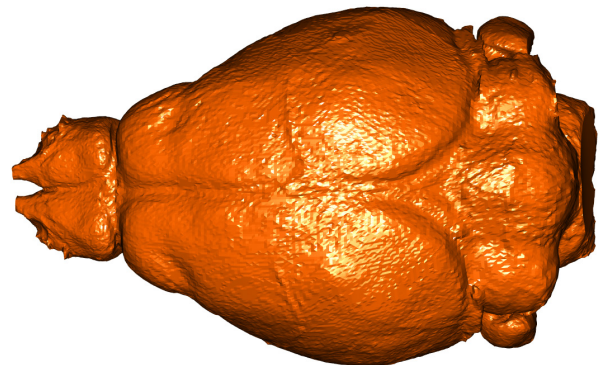

**Phalangeroidea**

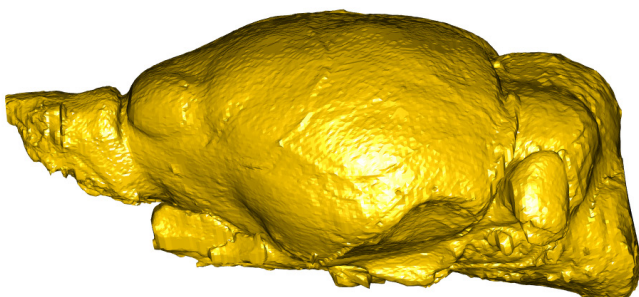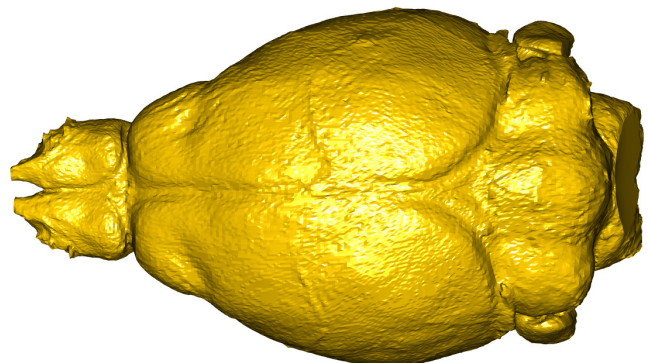

**Vombatiformes**

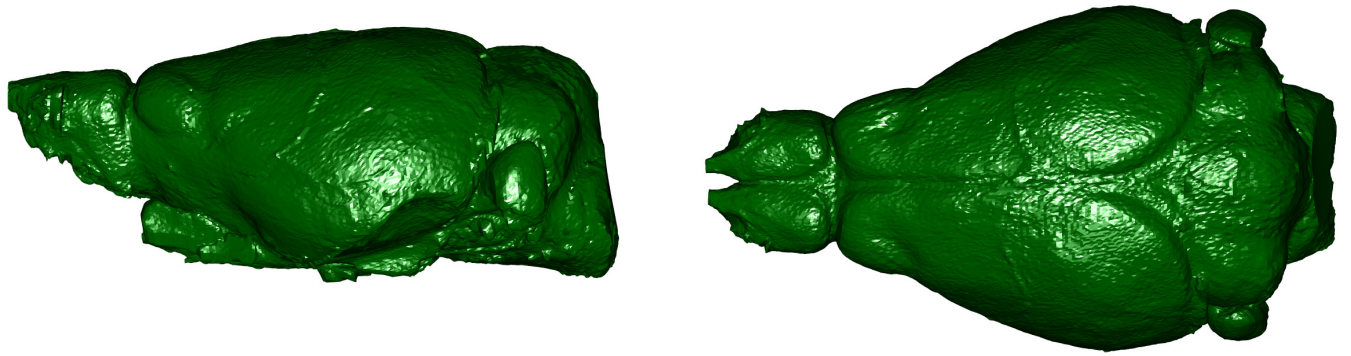

**Didelphimorphia**

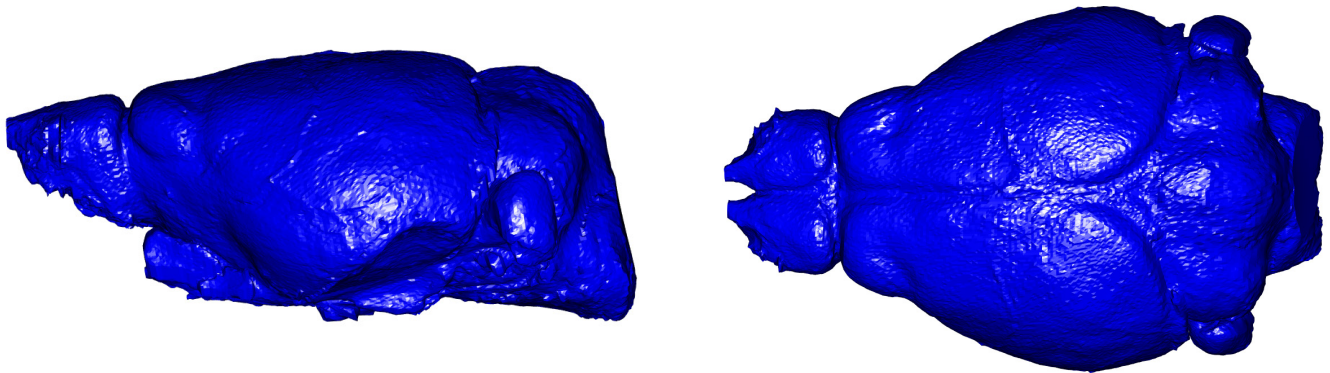

**Dasyuromorphia**

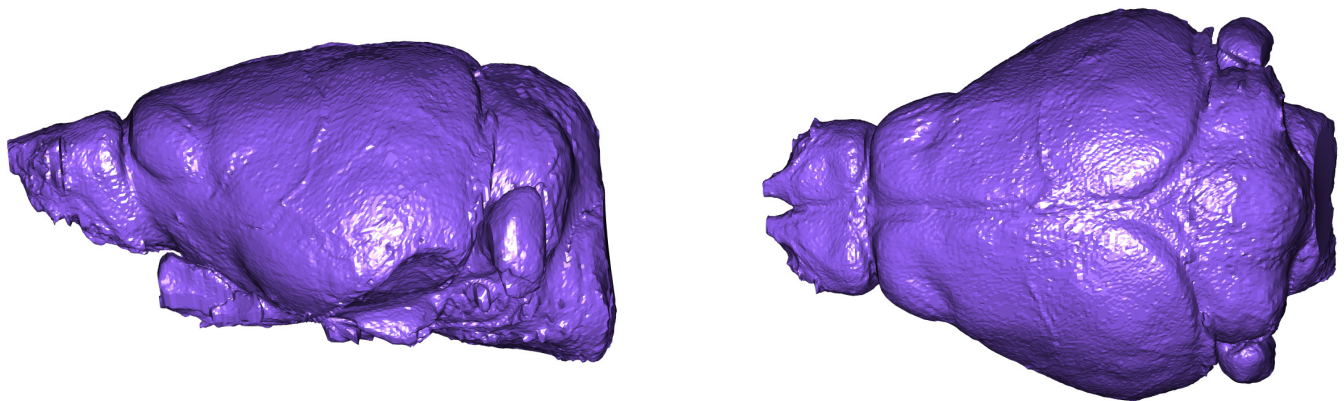

**Peramelemorphia**

**Supplementary Figure 5:** Mean shapes for the Diprotodontian major clades and the three remaining orders of marsupials for which multiple specimens were available.

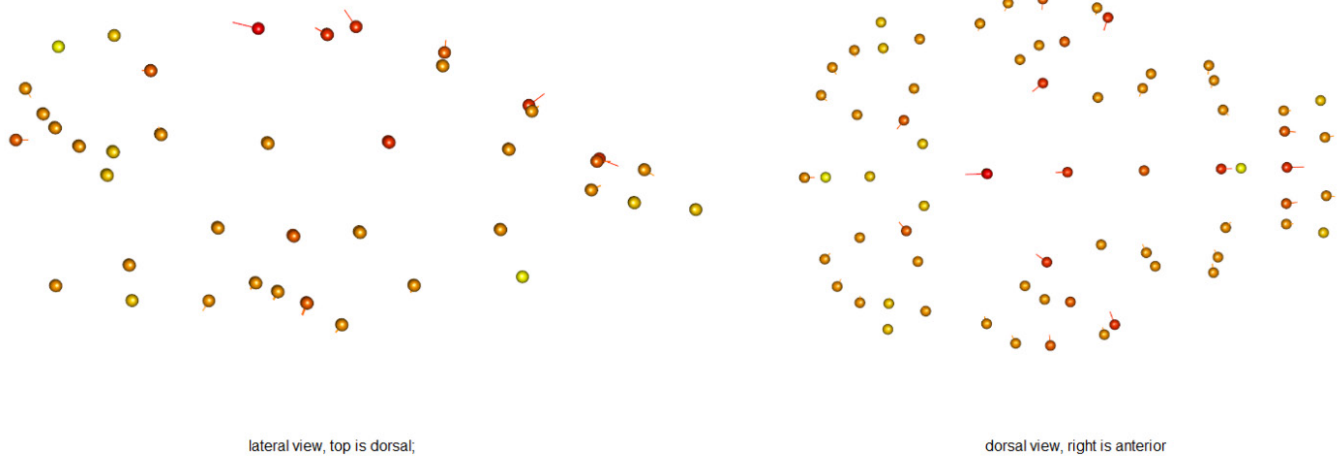

**Supplementary Figure 6:** Lateral (left) and dorsal (right) heat plots of the distribution of shape variation magnitudes in the mean configuration of diprotodontial marsupials (balls) compared to the mean landmark configuration of macropodiforms (kangaroos; ends of hairline vectors). The colouration is calibrated for the greatest magnitude in landmark displacement to be darkest red, and the least magnitude to be the lightest yellow. Note the lack of substantial movement around the brain base.



Orufus\_F\_UNEM9332

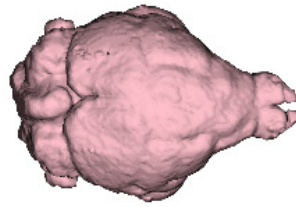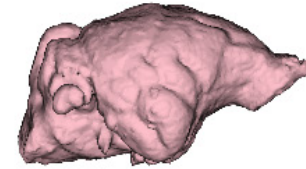

Orufus\_M\_UNEM9328

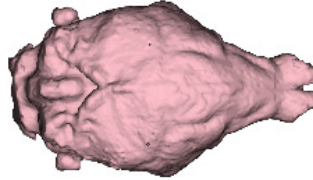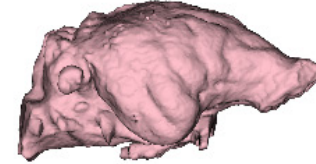

**Supplementary Figure 7:** Dorsal (left) and lateral (right) images of brains of a female (top) and male (bottom) red kangaroo (*Osphranter rufus*). Note the substantial differences in shape, particularly in terms of width and inclination.

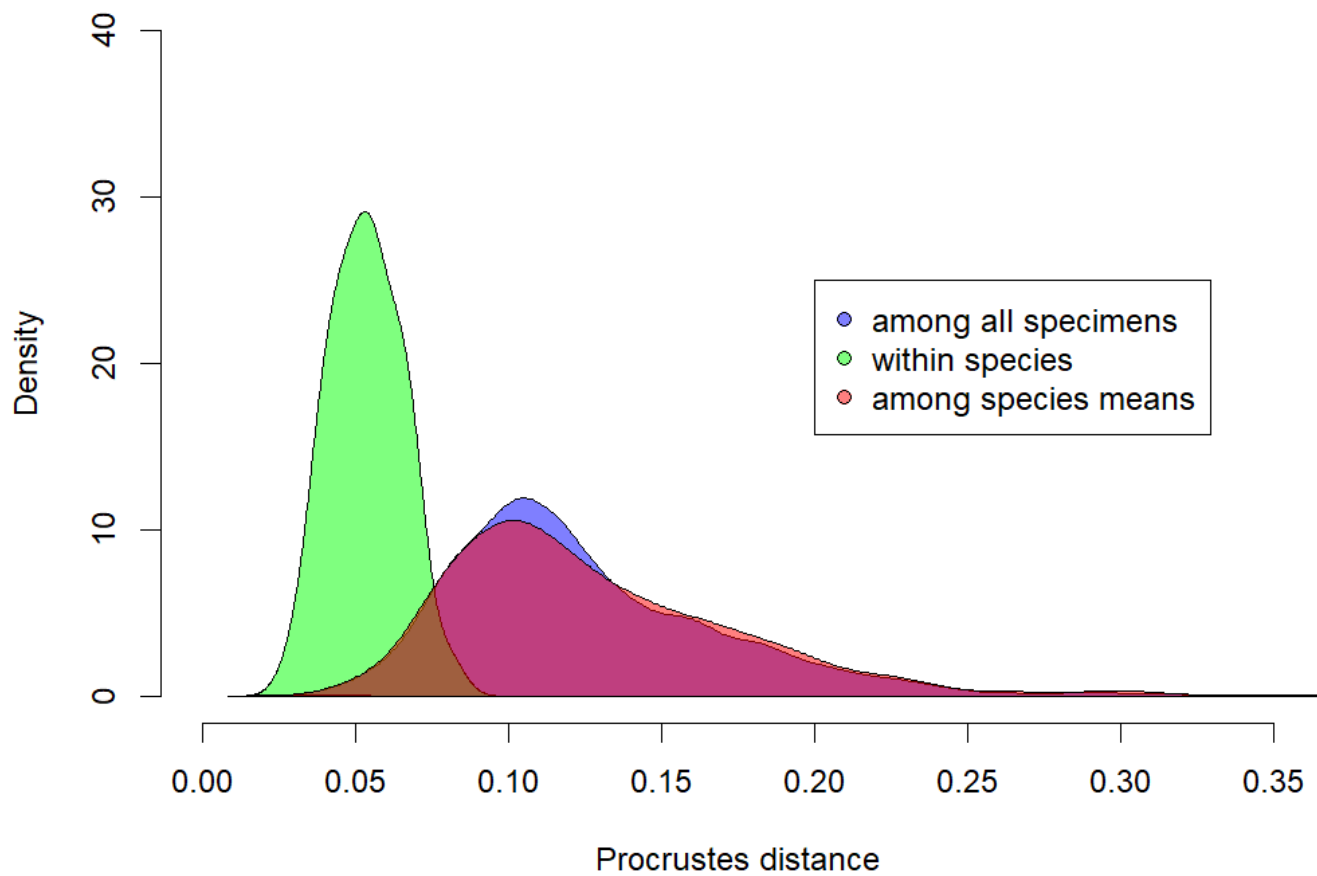

**Supplementary Figure 8:** Density plots of the frequency of Procrustes distances (i.e. taking all of shape into consideration), showing that Procrustes distances within species are generally lower than among species means or among all specimens.

## **Supplementary Information 1: Methodological details for landmark placement, endocast dissection, and the phylogenies used.**

### **Landmarks**

Refer to Fig.1 below for illustration of landmarks. The numbers indicated below are the automatic patch placement; note that the procedure of automatic patch placement changes the landmark numbers from the numbers originally given in Checkpoint. The anatomical terminology was taken from Macrini *et al.* (2007).

#### **Fixed landmarks:**

- 1: Left paraflocculus
- 2: Right paraflocculus
- 3: Anterior midpoint of hind brain
- 4: Base of olfactory bulb
- 5: Left Tip of olfactory bulb
- 6: Right Tip of olfactory bulb
- 7: Left hypoglossal foramen
- 8: Right hypoglossal foramen

#### **Fixed landmarks of patch:**

The patch was constructed in checkpoint, which only produces square patches which are difficult to place on round objects like the brain. To enable the characterisation of the lateral sides of the brain, we therefore placed two-point curves in checkpoint between landmarks 25-22, 44-22, 47-24 (left) and 26-24, 50-22, 53-22 (right). However, landmarks shared with the patch and the curve landmarks thus obtained were slid as a patch, as seen in Fig. 2.

- 36: Point of divergence between the two cerebral hemispheres, just anterior to the transverse sinus
- 35,39: Center of indentation between cerebrum, lateral, and middle cerebellar lobe
- 21,23: Point on cerebrum anterior to prootic vein exit
- 37: Center of patch – on the cerebral midline and equidistant from points 38 and 36
- 25,26: lateral extremity of junction between olfactory bulb and cerebral hemispheres
- 38: midpoint of the cross described by the midline of the brain and the junction between olfactory bulb and cerebral hemispheres
- 21-22, 23-24: Point on cerebrum anterior to prootic vein exit (shared with patch) to point of divergence between cerebral hemisphere and emergence of V2 (maxillary branch of trigeminus)

#### **Curves (all with two end points and two semilandmarks):**

- 9-12: Base to top of middle cerebellar lobe
- 13-16, 17-20: posteriormost point of lateral cerebral lobe to highest point of parafloccular stalk
- 30-27: Connecting the lateral-most points of each olfactory bulb side.
- 35-39: connecting the ventral stalk nerves exiting the jugular foramen.

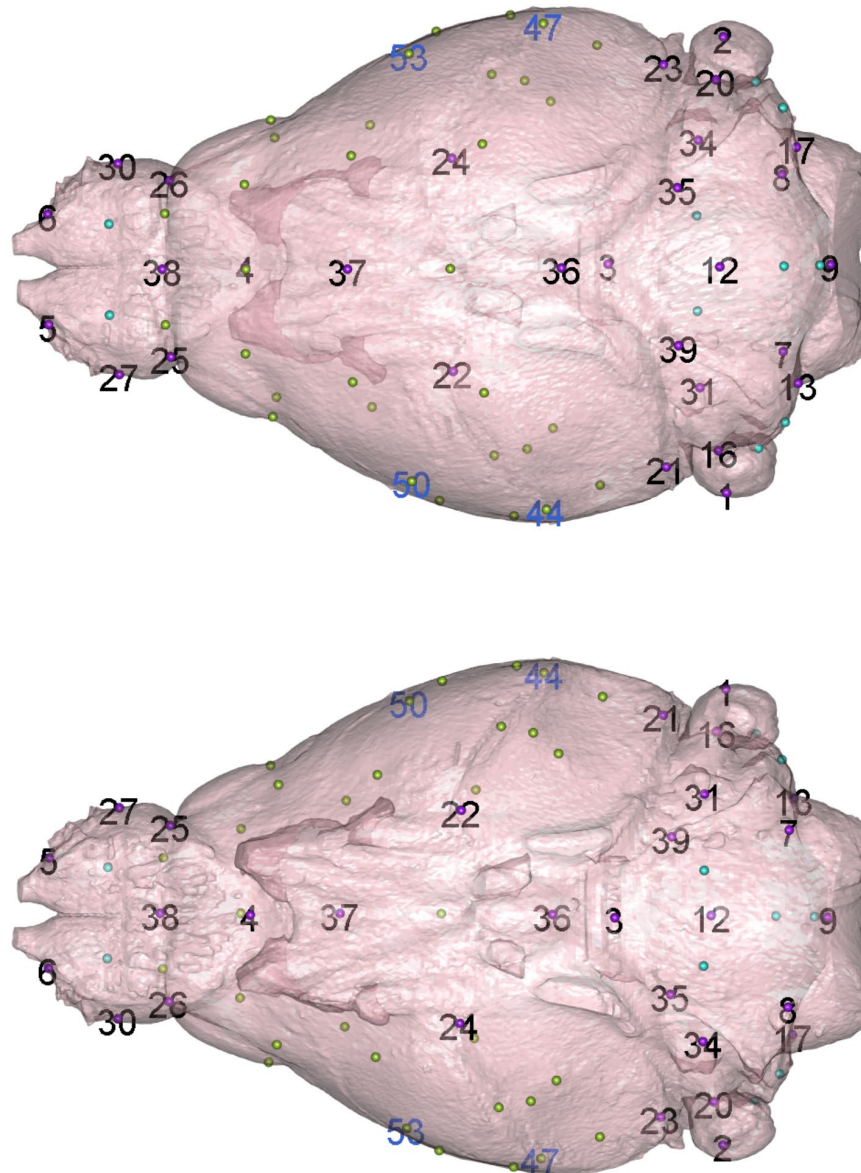

**Figure 1:** Numbers of fixed landmarks outlined above on the brain of *Phascogale tapoatafa* JM12395 (the specimen used to produce the atlas for automatic landmark placements), warped to the mean shape in geomorph. The blue numbers represent auxiliary curve origins placed in checkpoint to allow for the application of sliding surface semilandmarks on the lateral side of the brain. Numbers are given for all fixed landmarks, superimposed on the landmarks which are coloured as in Fig. 1.

### **Endocast dissection**

All sections were performed in Mimics V. 17-20, or for corrections of irregular cuts in 3Matics v. 9. See Fig. 2 for an illustration of the dissections. The dissected volumes are all available on Figshare repository <http://10.0.23.196/m9.figshare.12284456>

#### **Olfactory bulb**

Cut along the groove between the olfactory bulb and the cerebral cortex.

#### **Cerebellum**

Dorsal line along the junction between cerebrum and cerebellum; cut between vestibulo-cochlear nerve and paraflocculus; cut along the boundary of cerebellum and medulla.

#### **Brain stem**

Cut between vestibulo-cochlear nerve and paraflocculus; cut across the opening of the foramen magnum; cut across the medulla/pons boundary at the posterior end of the cerebral hemisphere behind the base of the foramen ovale of the trigeminal nerve (V5)

#### **Cerebrum**

Subtract the above three from the brain for cerebral volume

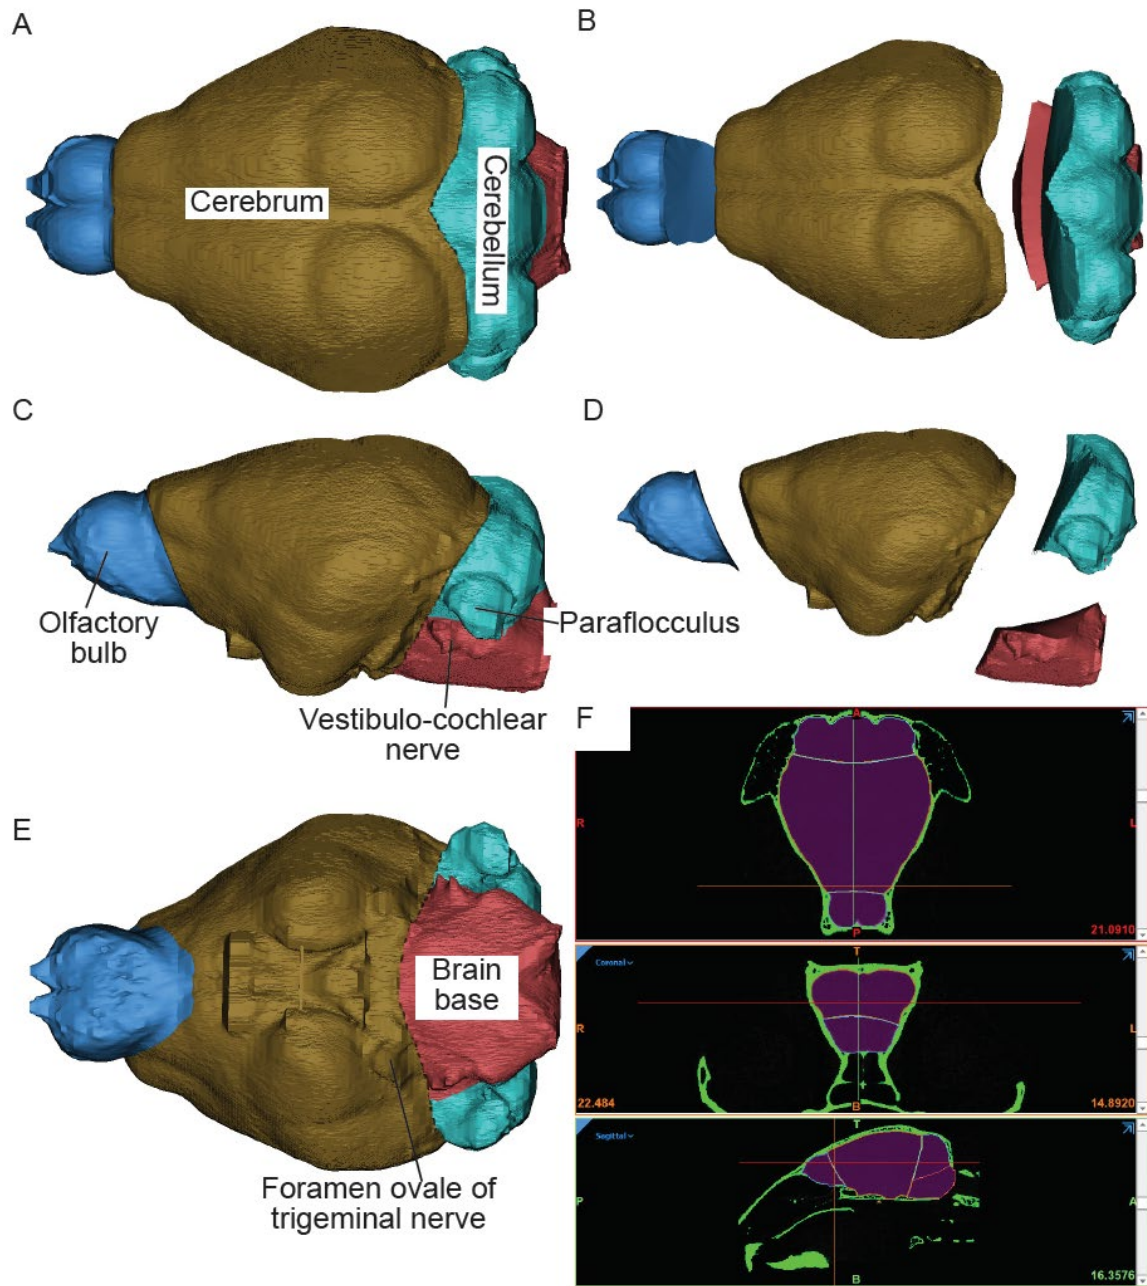

**Figure 2:** Details of endocast dissections in dorsal (A,B), lateral (C, D), and ventral (E) positions, illustrated on the brain of the sugar glider (*Petaurus breviceps*) TMMM82261. F) is the transverse, coronal, and sagittal view of the skull (in green) with the endocast in it (in pink). The thin lines reflect the lines along which the endocast was dissected.

## Phylogeny

Tree topology and divergence dates for living taxa follow Mitchell et al. (2014), except that the tree root was positioned between Didelphimorphia and the remaining extant orders following Gallus et al. (2015). *Borhyaena tuberata* is a member of Sparassodonta, which falls outside crown-clade Marsupialia (Forasiepi 2009); we have arbitrarily set the divergence of *Borhyaena* as 5 million years before the estimated time of origin of crown-clade Marsupialia. The macropodiforms *Balbaroo nalima* and *Ekaltadeta ima* are placed in a polytomy with Hypsiprymnodontidae, Potoroidae and Macropodidae (Black et al. 2014). The macropodid *Simosthenurus occidentalis* is assumed to have diverged at the same time as *Lagostrophus fasciatus* (Llamas et al. 2015). The fossil dasyuromorphian *Barinya wangala* is placed in a polytomy with Dasyuridae, Myrmecobiidae and Thylacinidae (Archer et al. Submitted), whereas the fossil thylacinid *Nimbacinus dicksoni* is assumed to have diverged from the recently extinct *Thylacinus* midway between the age of *Nimbacinus* (Woodhead et al. 2016) and the time of the Dasyuridae-Myrmecobiidae-Thylacinidae split. The extinct peramelemorphian *Galadi speciosus* is assumed to have diverged from the midpoint of the branch leading to crown-Peramelemorphia (Travouillon et al. 2015). Divergence dates for fossil vombatiforms are based on Beck et al. (Beck et al. 2014a). Three different positions for *Yalkaparidon coheni* were tested (following the phylogenetic analyses of Beck et al. (2014b)): stem-diprotodontian (diverging at the midpoint of the branch leading to crown-Diprotodontia), stem-australidelphian (diverging at the midpoint of the branch leading to crown-Australidelphia), and member of Agreodontia sensu Beck et al. (2014b) in a polytomy with Dasyuromorphia, Peramelemorphia and Notoryctemorphia. For all phylogenetic analyses, all three placements for *Yalkaparidon* were tested and results were averaged.

- Archer, M., S. J. Hand, K. H. Black, R. M. Beck, M. Archer, L. A. B. Wilson, S. Kealy, and T.-t. Hung. Submitted. A new family of bizarre durophagous carnivorous marsupials from Miocene deposits in the Riversleigh World Heritage Area, northwestern Queensland. *Scientif. Rep.*
- Beck, R. M., J. Louys, and P. Brewer. 2014a. The skull and skeleton of a large-bodied diprotodontian marsupial from the Late Oligocene of central Australia and the origin of wombats. Society of Vertebrate Palaeontology Meeting, Berlin.
- Beck, R. M., K. J. Travouillon, K. P. Aplin, H. Godthelp, and M. Archer. 2014b. The Osteology and Systematics of the Enigmatic Australian Oligo-Miocene Metatherian *Yalkaparidon* (Yalkaparidontidae; Yalkaparidontia;? Australidelphia; Marsupialia). *J. Mamm. Evol.* **21**:127-172.
- Black, K. H., K. J. Travouillon, W. Den Boer, B. P. Kear, B. N. Cooke, and M. Archer. 2014. A new species of the basal “kangaroo” *Balbaroo* and a re-evaluation of stem macropodiform interrelationships. *PLoS ONE* **9**:e112705.
- Forasiepi, A. M. 2009. *Osteology of Arctodictis sinclairi (Mammalia, Metatheria, Sparassodonta) and phylogeny of Cenozoic metatherian carnivores from South America*. Museo Argentino de Ciencias Naturales.
- Gallus, S., A. Janke, V. Kumar, and M. A. Nilsson. 2015. Disentangling the relationship of the Australian marsupial orders using retrotransposon and evolutionary network analyses. *Genome Biol. Evol.* **7**:985-992.
- Llamas, B., P. Brotherton, K. J. Mitchell, J. E. Templeton, V. A. Thomson, J. L. Metcalf, K. N. Armstrong, M. Kasper, S. M. Richards, and A. B. Camens. 2015. Late Pleistocene Australian marsupial DNA clarifies the affinities of extinct megafaunal kangaroos and wallabies. *Mol. Biol. Evol.* **32**:574-584.
- Macrini, T. E., T. Rowe, and J. L. VandeBerg. 2007. Cranial endocasts from a growth series of *Monodelphis domestica* (Didelphidae, Marsupialia): a study of individual and ontogenetic variation. *J. Morphol.* **268**:844-865.

- Mitchell, K. J., R. C. Pratt, L. N. Watson, G. C. Gibb, B. Llamas, M. Kasper, J. Edson, B. Hopwood, D. Male, K. Armstrong, M. Meyer, M. Hofreiter, J. Austin, S. C. Donnellan, M. S. Y. Lee, M. J. Phillips, and A. Cooper. 2014. Molecular phylogeny, biogeography, and habitat preference evolution of marsupials. *Mol. Biol. Evol.* **31**:2322-2330.
- Travouillon, K. J., M. Archer, S. J. Hand, and J. Muirhead. 2015. Sexually dimorphic bandicoots (Marsupialia: Peramelemorphia) from the Oligo-Miocene of Australia, first cranial ontogeny for fossil bandicoots and new species descriptions. *J. Mamm. Evol.* **22**:141-167.
- Woodhead, J., S. J. Hand, M. Archer, I. Graham, K. Sniderman, D. A. Arena, K. H. Black, H. Godthelp, P. Creaser, and E. Price. 2016. Developing a radiometrically-dated chronologic sequence for Neogene biotic change in Australia, from the Riversleigh World Heritage Area of Queensland. *Gondwana Res.* **29**:153-167.
